RESEARCH ARTICLE

# The Association of Type 2 Diabetes Loci Identified in Genome-Wide Association Studies with Metabolic Syndrome and Its Components in a Chinese Population with Type 2 Diabetes

Xiaomu Kong<sup>☯</sup>, Xuelian Zhang<sup>☯</sup>, Xiaoyan Xing, Bo Zhang, Jing Hong, Wenyong Yang\*

Department of Endocrinology, China-Japan Friendship Hospital, Beijing, China

☯ These authors contributed equally to this work.

\* [ywyong\\_1010@163.com](mailto:ywyong_1010@163.com)

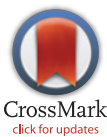

OPEN ACCESS

**Citation:** Kong X, Zhang X, Xing X, Zhang B, Hong J, Yang W (2015) The Association of Type 2 Diabetes Loci Identified in Genome-Wide Association Studies with Metabolic Syndrome and Its Components in a Chinese Population with Type 2 Diabetes. PLoS ONE 10(11): e0143607. doi:10.1371/journal.pone.0143607

**Editor:** Nicholette D. Palmer, Wake Forest School of Medicine, UNITED STATES

**Received:** May 19, 2015

**Accepted:** November 6, 2015

**Published:** November 24, 2015

**Copyright:** © 2015 Kong et al. This is an open access article distributed under the terms of the [Creative Commons Attribution License](http://creativecommons.org/licenses/by/4.0/), which permits unrestricted use, distribution, and reproduction in any medium, provided the original author and source are credited.

**Data Availability Statement:** All relevant data are within the paper and its Supporting Information files.

**Funding:** The Chinese National Diabetes and Metabolic Disorders Study was supported by grants from the Chinese Medical Association Foundation (<http://en.cma.org.cn>), Sanofi (China) Investment Company Limited (<http://www.sanofi.cn/cn/zh/index.jsp>) and the National 973 Program (2011CB504001) (<http://www.973.gov.cn>). XK was supported by Award Number 2012M520200 from China Postdoctoral Science Foundation Grant (<http://res.chinapostdoctor.org.cn>) and the Award Number D43TW009107 from

## Abstract

Metabolic syndrome (MetS) is prevalent in type 2 diabetes (T2D) patients. The comorbidity of MetS and T2D increases the risk of cardiovascular complications. The aim of the present study was to determine the T2D-related genetic variants that contribute to MetS-related components in T2D patients of Chinese ancestry. We successfully genotyped 25 genome wide association study validated T2D-related single nucleotide polymorphisms (SNPs) among 5,169 T2D individuals and 4,560 normal glycemic controls recruited from the Chinese National Diabetes and Metabolic Disorders Study (DMS). We defined MetS in this population using the harmonized criteria (2009) combined with the Chinese criteria for abdominal obesity. The associations between SNPs and MetS-related components, as well as the associations between SNPs and risk for T2D with or without MetS, were subjected to logistic regression analysis adjusted for age and sex. Results showed that the T2D risk alleles of rs243021 located near *BCL11A*, rs10830963 in *MTNR1B*, and rs2237895 in *KCNQ1* were related to a lower risk for abdominal obesity in T2D patients (rs243021: 0.92 (0.84, 1.00),  $P = 4.42 \times 10^{-2}$ ; rs10830963: 0.92 (0.85, 1.00),  $P = 4.07 \times 10^{-2}$ ; rs2237895: 0.89 (0.82, 0.98),  $P = 1.29 \times 10^{-2}$ ). The T2D risk alleles of rs972283 near *KLF14* contributed to a higher risk of elevated blood pressure (1.10 (1.00, 1.22),  $P = 4.48 \times 10^{-2}$ ), while the T2D risk allele of rs7903146 in *TCF7L2* was related to a lower risk for elevated blood pressure (0.74 (0.61, 0.90),  $P = 2.56 \times 10^{-3}$ ). The T2D risk alleles of rs972283 near *KLF14* and rs11634397 near *ZFAND6* were associated with a higher risk for elevated triglycerides (rs972283: 1.11 (1.02, 1.24),  $P = 1.46 \times 10^{-2}$ ; rs11634397: 1.14 (1.00, 1.29),  $P = 4.66 \times 10^{-2}$ ), while the T2D risk alleles of rs780094 in *GCKR* and rs7903146 in *TCF7L2* were related to a lower risk of elevated triglycerides (rs780094: 0.86 (0.80, 0.93),  $P = 1.35 \times 10^{-4}$ ; rs7903146: 0.82 (0.69, 0.98),  $P = 3.18 \times 10^{-2}$ ). The genotype risk score of the 25 T2D-related SNPs was related to a lower risk for abdominal obesity ( $P_{\text{trend}} = 1.29 \times 10^{-2}$ ) and lower waist circumference ( $P = 2.20 \times 10^{-3}$ ). Genetic variants of *WFS1*, *CDKAL1*, *CDKN2BAS*, *TCF7L2*, *HHEX*, *KCNQ1*, *TSPAN8/LGR5*, *FTO*, and *TCF2* were associated with the risk for T2D with MetS, as well as the risk for development of T2D with at least one of the MetS components ( $P < 0.05$ ).

Fogarty International Center of the National Institutes of Health (<http://www.fic.nih.gov>). The funders had no role in study design, data collection and analysis, decision to publish, or preparation of the manuscript.

**Competing Interests:** The authors have the following interests: this study was partly funded by Sanofi (China) Investment Company Limited. There are no patents, products in development or marketed products to declare. This does not alter the authors' adherence to all the PLOS ONE policies on sharing data and materials, as detailed online in the guide for authors.

In addition, genetic variants of *BCL11A*, *GCKR*, *ADAMTS9*, *CDKAL1*, *KLF14*, *CDKN2BAS*, *TCF7L2*, *CDC123/CAMK1D*, *HHEX*, *MTNR1B*, and *KCNQ1* contributed to the risk for T2D without MetS ( $P < 0.05$ ). In conclusion, these findings highlight the contribution of T2D-related genetic loci to MetS in a Chinese Han population. The study also provides insight into the pleiotropic effects of genome-wide association loci of diabetes on metabolic regulation.

## Introduction

The pathogenesis of type 2 diabetes (T2D) is mediated by insulin resistance and abnormal insulin secretion. Metabolic syndrome (MetS), which is defined as a cluster of metabolic disturbances related to insulin resistance, including abdominal obesity, hyperglycemia, hypertension, and dyslipidemia, is common in people with T2D. Epidemiologic studies suggested that patients with MetS have a greater risk for cardiovascular disease (CVD) regardless of a previous history of cardiovascular events [1]. Further, concomitant T2D and MetS contribute to a higher prevalence of CVD in T2D population [2]. Therefore, the identification of risk factors for MetS as well as MetS-related components is important for the management and prevention of CVD in T2D.

MetS, along with the associated metabolic traits, is known to be partly hereditary [3,4,5]. For example, in Europe, the heritability of MetS was 23% to 27% in a Dutch isolate [4], and 27% among Italians [3]. It's shown that MetS has 51% to 60% heritability in Koreans [5]. High-throughput technologies have revealed numerous susceptible genomic loci of both T2D and MetS [6,7,8,9,10,11], mostly in Caucasians. For example, our previous study confirmed the associations between single nucleotide polymorphisms (SNPs) in or near *WFS1*, *CDKAL1*, *CDKN2A/2B*, *CDC123/CAMK1D*, *HHEX*, *TCF7L2*, *KCNQ1*, *MTNR1B* and the risk for T2D in a Chinese Han population as well as the associations between T2D-related SNPs and glycemic traits [12]. On the other hand, candidate genetic approaches found that several T2D-related genetic variants in *TCF7L2* [13,14,15,16], *PPARG* [17,18], and *FTO* [19,20,21] were associated with MetS in the general population. A recently study in Chinese elderly population examined the association between a group of T2D-related genetic variants and MetS, which was not significant [22]. However, finding the genetic contributors of the individual components of MetS is of greater biological interest than the identification of susceptible genomic loci for MetS as a binary trait, since the definition of MetS is based on a constellation of clinical features [9]. In fact, the T2D-related genetic variants showed pleiotropic effects to multiple MetS-related traits other than blood glucose, which included blood pressure, obesity and lipids profiles [23,24,25,26]. Consequently, we speculated that T2D-related genetic variants could contribute substantially to MetS-related components in Chinese population afflicted with T2D.

The aim of the present study was to examine the relationship between genome-wide association study (GWAS)-validated T2D-related genomic loci with the risk for MetS-related components, as well as T2D with MetS and without MetS in a large Chinese Han population comprising of 5,169 T2D patients and 4,560 normal glycemic controls from the Chinese National Diabetes and Metabolic Disorders Study (DMS) [27].

## Methods

### Ethics statement

The study protocol was approved by the Ethics Committee of the China-Japan Friendship Hospital in Beijing and was in accordance with the Helsinki Declaration II. Written informed consents were obtained from all the participants before data collection.

## Study participants and definition of MetS-related components

All the study participants were recruited from the DMS [27]. T2D cases were identified using the 1999 WHO criteria, as fasting plasma glucose (FPG)  $\geq 7.0$  mmol/l, 2-h oral glucose tolerance test (OGTT) plasma glucose  $\geq 11.1$  mmol/l, or a self-reported history of T2D. Our analysis included 5,169 T2D patients and 4,560 normal glycemic individuals in DMS, with complete availability of all data pertaining to MetS-related traits.

The diabetic subjects were grouped into 3,651 T2D patients with MetS (MetS T2D) and 1,518 T2D patients without MetS (non-MetS T2D), based on their metabolic phenotypes according to the latest harmonized criteria proposed by the International Diabetes Federation (IDF) and the American Heart Association (AHA) / National Heart, Lung and Blood Institute (NHLBI) in 2009 [28] combined with an amended definition of abdominal obesity for Chinese Hans [29]. MetS was defined as the presence of three or more of the following features: (a) waist circumference (WC)  $\geq 90$  cm for men or  $\geq 85$  cm for women [29]; (b) elevated fasting blood glucose  $\geq 5.6$  mmol/l (100 mg/dl), or drug treatment for hyperglycemia; (c) elevated blood pressure  $\geq 130/85$  mm Hg, or antihypertensive drug treatment with a history of hypertension; (d) elevated triglycerides (TG)  $\geq 1.70$  mmol/l (150 mg/dl), or drug treatment for hypertriglyceridemia; and (e) reduced high density lipoprotein-cholesterol (HDL-C)  $< 1.03$  mmol/l (40 mg/dl) for men, or  $< 1.29$  mmol/l (50 mg/dl) for women. In addition, 4,373 out of 4,560 normal glycemic individuals in DMS without MetS were recruited as controls for appropriate comparisons (non-MetS controls), among which 1,956 of them had none of the five MetS components (non-MetS super controls).

## Body measurements and laboratory methods

Body weight, height, and WC were measured using standard methods. Body mass index (BMI) was calculated as weight (kg) divided by squared height ( $m^2$ ). The resting blood pressure were measured twice and averaged following standard protocol.

Each participant completed a standard 75 g OGTT after overnight fasting. Blood samples were drawn at 0 min, 30 min, and 2 h after OGTT to measure the plasma glucose and serum insulin concentrations. Serum insulin was measured by double-antibody radioimmunoassay. The homeostasis model assessment for  $\beta$ -cell function (HOMA-B) and insulinogenic index were calculated to estimate  $\beta$ -cell function, and the homeostasis model assessment for insulin resistance (HOMA-IR) and Matsuda index (ISIm) were used to assess insulin resistance using the following formulae:

$$\text{HOMA-B} = \text{fasting serum insulin} \times 20 / (\text{FPG} - 3.5)$$
 (with serum insulin in mU/l and plasma glucose in mmol/l) [30]

$$\text{Insulinogenic index} = (\text{serum insulin at 30 min} - \text{fasting serum insulin}) / (\text{plasma glucose at 30 min} - \text{FPG})$$
 (with serum insulin in mU/l and plasma glucose in mmol/l) [31]

$$\text{HOMA-IR} = \text{fasting serum insulin} \times \text{FPG} / 22.5$$
 (with serum insulin in mU/l and plasma glucose in mmol/l) [30]

$$\text{ISIm} = 10,000 / (\text{FPG} \times \text{fasting serum insulin} \times \text{mean OGTT glucose} \times \text{mean OGTT insulin})^{1/2}$$
 (with serum insulin in mU/l and plasma glucose in mg/dl) [32]

Serum concentrations of fasting TG and HDL-C in plasma were assessed using an automated biochemical analyzer (Olympus, Tokyo, Japan) according to the manufacturer's instructions.

## Genotyping

Genomic DNA samples were isolated from the peripheral blood using a DNA extraction kit. We selected 31 T2D-related SNPs validated by GWAS previously

[33,34,35,36,37,38,39,40,41,42,43,44,45]. Genotyping was accomplished using Illumina GoldenGate Indexing assay (Illumina Inc., San Diego, USA) according to the manufacturer's instructions. Six of 31 SNPs were excluded because of genotyping success rate lower than 90% (rs231362, rs1531343, rs5945326, and rs13266634) or minor allele frequency (MAF) was less than 0.01 (rs7578597, rs7957197). The overall mean calling rate of remaining 25 SNPs was 97.71%. The concordance rate based on 229 genotyping duplication was 100%. Information of the genotyped SNPs is listed in [S1 Table](#).

## Statistical analysis

The Hardy-Weinberg equilibrium test was tested using a  $\chi^2$  test in the study population ([S1 Table](#)). Under an additive genetic assumption, logistic regression analysis was used to test the associations of SNPs with MetS-related components in T2D patients, and was applied in the other analyses as appropriate. Non-Gaussian distributed quantitative traits were natural logarithmically transformed to normal distributions. A linear regression model was used to test the associations between SNPs and quantitative traits. Two multivariable models were tested: model 1, age and sex were adjusted as co-variables; and model 2, age, sex, and BMI were adjusted. A genetic risk score (GRS) of the 25 T2D-related SNPs was constructed using the sum of alleles which were reported as T2D risk alleles in each individual without missing data. The risks for MetS-related components were compared among quartiles of GRS in T2D patients as well as the quantitative traits. Bonferroni correction was used to correct multiple testing. Statistical analyses were performed using SAS (version 9.3; SAS Institute, Cary, NC) and PLINK software (v1.05).

## Results

### Clinical demographics of the study population

The clinical demographics of MetS T2D and non-MetS T2D patients, along with non-MetS controls from DMS, are shown in [Table 1](#). The non-MetS control group and the MetS T2D group included more women than the non-MetS T2D group ( $P < 0.0001$ ). As expected, both T2D groups, regardless of MetS status, manifested significant disorders of adiposity, glucose, blood pressure, and lipids (except for HDL-C) compared with non-MetS control individuals ( $P < 0.0001$ ). Only MetS T2D showed lower fasting HDL-C than controls. Notably, compared with the non-MetS T2D, the MetS T2D group showed significantly increased weight, BMI and WC, elevated glucose and insulin levels during fasting and OGTT, greater insulin resistance and  $\beta$ -cell dysfunction, elevated blood pressure as well as higher concentration of fasting TG, and lower HDL-C levels (all  $P$  values  $< 0.0001$ ).

### Associations of SNPs with MetS-related components among T2D patients

As shown in [Table 2](#), the reported T2D risk alleles of rs243021 near *BCL11A*, rs10830963 in *MTNR1B*, and rs2237895 in *KCNQ1* were associated with a lower risk for abdominal obesity in T2D patients (rs243021: 0.92 (0.84, 1.00),  $P = 4.42 \times 10^{-2}$ ; rs10830963: 0.92 (0.85, 1.00),  $P = 4.07 \times 10^{-2}$ ; rs2237895: 0.89 (0.82, 0.98),  $P = 1.29 \times 10^{-2}$ ). The T2D risk alleles of rs972283 near *KLF14* contributed to elevated blood pressure (1.10 (1.00, 1.22),  $P = 4.48 \times 10^{-2}$ ), while the T2D risk allele of rs7903146 in *TCF7L2* was related to a lower risk for elevated blood pressure (0.74 (0.61, 0.90),  $P = 2.56 \times 10^{-3}$ ). The T2D risk alleles of rs972283 near *KLF14* and rs11634397 near *ZFAND6* were associated with a higher risk for elevated TG level (rs972283: 1.11 (1.02, 1.24),  $P = 1.46 \times 10^{-2}$ ; rs11634397: 1.14 (1.00, 1.29),  $P = 4.66 \times 10^{-2}$ ), while the T2D

**Table 1. Clinical demographics of study population.** Abbreviations: BMI, body mass index; HDL-C, high density lipoprotein-cholesterol; HOMA-B, the homeostasis model assessment for  $\beta$ -cell function; HOMA-IR, the homeostasis model assessment for insulin resistance; ISIm, Matsuda index; MetS, metabolic syndrome; OGTT, oral glucose tolerance test; T2D, type 2 diabetes. Data are shown as median (interquartile range) or %. All non-Gaussian distributed quantitative traits were natural logarithmically transformed to normalize distributions. *P* values were calculated to assess the intergroup differences using  $\chi^2$  test or one-way ANOVA.

|                                | Non-MetS Control        | Non-MetS T2D                         | MetS T2D                              | <i>P</i> |
|--------------------------------|-------------------------|--------------------------------------|---------------------------------------|----------|
| <i>n</i>                       | 4,373                   | 1,518                                | 3,651                                 |          |
| Male, <i>n</i> (%)             | 1,393 (31.85)           | 730 (48.09)                          | 1,506 (41.25)                         | < 0.0001 |
| Age, year                      | 49.00 (44.00, 56.00)    | 54.00 (45.00, 63.00) <sup>a</sup>    | 57.00 (48.00, 65.00) <sup>ab</sup>    | < 0.0001 |
| BMI, kg/m <sup>2</sup>         | 22.96 (21.21, 24.67)    | 23.40 (21.62, 25.03) <sup>a</sup>    | 26.70 (24.56, 29.03) <sup>ab</sup>    | < 0.0001 |
| Weight, kg                     | 59.00 (53.50, 65.00)    | 60.80 (54.50, 67.00) <sup>a</sup>    | 69.40 (61.50, 77.20) <sup>ab</sup>    | < 0.0001 |
| Waist circumference, cm        | 78.50 (73.00, 84.00)    | 81.00 (76.00, 85.00) <sup>a</sup>    | 91.00 (85.60, 97.00) <sup>ab</sup>    | < 0.0001 |
| Fasting plasma glucose, mmol/l | 5.00 (4.66, 5.35)       | 7.16 (5.95, 8.68) <sup>a</sup>       | 7.41 (6.34, 9.07) <sup>ab</sup>       | < 0.0001 |
| 30-min OGTT glucose, mmol/l    | 8.04 (6.93, 9.16)       | 11.49 (9.48, 13.78) <sup>a</sup>     | 12.04 (10.00, 14.39) <sup>ab</sup>    | < 0.0001 |
| 120-min OGTT glucose, mmol/l   | 5.70 (4.89, 6.55)       | 12.71 (9.98, 16.60) <sup>a</sup>     | 13.61 (11.41, 17.00) <sup>ab</sup>    | < 0.0001 |
| Fasting serum insulin, mU/l    | 6.27 (4.88, 8.41)       | 7.01 (5.09, 9.91) <sup>a</sup>       | 9.60 (6.75, 13.84) <sup>ab</sup>      | < 0.0001 |
| 30-min OGTT insulin, mU/l      | 32.93 (20.90, 52.42)    | 16.13 (9.22, 31.39) <sup>a</sup>     | 21.60 (12.71, 37.95) <sup>ab</sup>    | < 0.0001 |
| 120-min OGTT insulin, mU/l     | 22.09 (13.71, 34.69)    | 24.60 (14.05, 43.34) <sup>a</sup>    | 36.76 (20.76, 66.81) <sup>ab</sup>    | < 0.0001 |
| Systolic blood pressure, mmHg  | 115.00 (107.50, 122.50) | 120.00 (110.00, 130.00) <sup>a</sup> | 137.50 (125.00, 150.00) <sup>ab</sup> | < 0.0001 |
| Diastolic blood pressure, mmHg | 75.00 (70.00, 80.00)    | 78.00 (70.00, 80.00) <sup>a</sup>    | 82.50 (78.00, 90.00) <sup>ab</sup>    | < 0.0001 |
| Triglycerides, mmol/l          | 1.01 (0.77, 1.28)       | 1.13 (0.85, 1.44) <sup>a</sup>       | 1.96 (1.42, 2.84) <sup>ab</sup>       | < 0.0001 |
| HDL-C, mmol/l                  | 1.39 (1.19, 1.62)       | 1.40 (1.21, 1.61)                    | 1.16 (0.99, 1.36) <sup>ab</sup>       | < 0.0001 |
| HOMA-IR                        | 1.38 (1.04, 1.87)       | 2.29 (1.54, 3.54) <sup>a</sup>       | 3.27 (2.17, 4.94) <sup>ab</sup>       | < 0.0001 |
| ISIm                           | 8.45 (6.28, 11.40)      | 5.52 (3.81, 7.79) <sup>a</sup>       | 3.89 (2.63, 5.59) <sup>ab</sup>       | < 0.0001 |
| HOMA-B, %                      | 86.30 (61.29, 126.64)   | 40.87 (24.06, 65.67) <sup>a</sup>    | 49.94 (30.34, 80.16) <sup>ab</sup>    | < 0.0001 |
| Insulinogenic index            | 8.98 (4.53, 16.81)      | 1.93 (0.50, 4.87) <sup>a</sup>       | 2.45 (0.82, 5.77) <sup>ab</sup>       | < 0.0001 |

<sup>a</sup> *P* value < 0.05 compared with non-MetS control subject in multiple comparison using Dunnett's test.

<sup>b</sup> *P* value < 0.05 compared with non-MetS T2D patients in multiple comparison using Dunnett's test.

doi:10.1371/journal.pone.0143607.t001

risk alleles of rs780094 in *GCKR* and rs7903146 in *TCF7L2* were related to lower risk for elevated TG (rs780094: 0.86 (0.80, 0.93),  $P = 1.35 \times 10^{-4}$ ; rs7903146: 0.82 (0.69, 0.98),  $P = 3.18 \times 10^{-2}$ ). The association between rs780094 and elevated TG remained significant after Bonferroni correction for multiple testing ( $P < 5.00 \times 10^{-4}$ ). Similar results were achieved when further adjusted for BMI, except that the associations between rs10830963, rs2237895 and abdominal obesity were attenuated ( $P > 0.05$ ). In addition, the associations between single SNPs and the MetS-related components were examined in the entire population of T2D cases and normal glycemic controls with additional adjustment of diabetes status (S2 Table).

### GRS of 25 T2D-related SNPs on the risk for MetS-related components among T2D patients

The GRS for 25 T2D-related SNPs showed nominal association with a lower risk for abdominal obesity (WC  $\geq 90$  cm for men or  $\geq 85$  cm for women), as well as decreased WC (Table 3). Compared with the lowest quartile of GRS, the ORs (95% CIs) for the risk of abdominal obesity were 0.89 (0.75, 1.06), 0.84 (0.71, 1.00), and 0.76 (0.63, 0.90) for the other three quartiles ( $P$  for trend =  $1.29 \times 10^{-2}$ ). Individuals with additional T2D risk alleles showed a decreased WC (Q1~Q4: 89.00 (82.00, 96.00) cm, 88.00 (82.00, 95.00) cm, 88.00 (81.00, 94.00) cm, and 87.00 (80.00, 94.00) cm;  $P = 2.20 \times 10^{-3}$ ), and the association remained significant after Bonferroni correction ( $P < 1.25 \times 10^{-2}$ ). The associations were no longer significant after additional

**Table 2. Associations between T2D-related SNPs with MetS-related components in T2D participants.** Abbreviations: BMI, body mass index; Chr, chromosome; CI, confidence interval; HDL-C, high density lipoprotein-cholesterol; MetS, metabolic syndrome; OR, odds ratio; SNP, single nucleotide polymorphism; T2D, type 2 diabetes. OR and 95% CI are indicated for the reported T2D risk allele of each SNP with MetS or MetS-related components using logistic regression under an additive assumption using the following models: model 1, age and sex were adjusted as co-variables; and model 2, age, sex, and BMI were adjusted. Associations with *P* value < 0.05 are shown in bold and underlined.

| Gene          | SNP        | Chr. | Major/minor allele <sup>a</sup> | Elevated waist circumference |                                  | Elevated blood pressure          |                                  | Elevated triglycerides           |                                  | Reduced HDL-C                    |                                  |                                  |
|---------------|------------|------|---------------------------------|------------------------------|----------------------------------|----------------------------------|----------------------------------|----------------------------------|----------------------------------|----------------------------------|----------------------------------|----------------------------------|
|               |            |      |                                 | Model 1                      | Model 2                          | Model 1                          | Model 2                          | Model 1                          | Model 2                          | Model 1                          | Model 2                          |                                  |
| NOTCH2        | rs10923931 | 1    | G/T                             | OR (95%CI)                   | 1.03 (0.84,1.27)                 | 1.02 (0.78,1.33)                 | 1.23 (0.97,1.56)                 | 1.24 (0.97,1.59)                 | 0.95 (0.78,1.17)                 | 0.94 (0.76,1.16)                 | 0.93 (0.75,1.15)                 | 0.92 (0.77,1.11)                 |
|               |            |      |                                 | <i>P</i>                     | <i>P</i> = 7.54x10 <sup>-1</sup> | <i>P</i> = 8.87x10 <sup>-1</sup> | <i>P</i> = 9.36x10 <sup>-2</sup> | <i>P</i> = 8.94x10 <sup>-2</sup> | <i>P</i> = 6.50x10 <sup>-1</sup> | <i>P</i> = 5.67x10 <sup>-1</sup> | <i>P</i> = 5.00x10 <sup>-1</sup> | <i>P</i> = 4.04x10 <sup>-1</sup> |
| BCL11A        | rs243021   | 2    | T/C                             | OR (95%CI)                   | 0.92 (0.84,1.00)                 | 0.87 (0.78,0.97)                 | 0.98 (0.89,1.09)                 | 0.99 (0.90,1.10)                 | 0.95 (0.88,1.04)                 | 0.96 (0.88,1.04)                 | 0.96 (0.88,1.05)                 | 1.04 (0.99,1.12)                 |
|               |            |      |                                 | <i>P</i>                     | <i>P</i> = 4.42x10 <sup>-2</sup> | <i>P</i> = 1.23x10 <sup>-2</sup> | <i>P</i> = 7.63x10 <sup>-1</sup> | <i>P</i> = 8.96x10 <sup>-1</sup> | <i>P</i> = 2.59x10 <sup>-1</sup> | <i>P</i> = 3.21x10 <sup>-1</sup> | <i>P</i> = 4.27x10 <sup>-1</sup> | <i>P</i> = 3.75x10 <sup>-1</sup> |
| GCKR          | rs780094   | 2    | A/G                             | OR (95%CI)                   | 0.96 (0.89,1.04)                 | 0.97 (0.88,1.07)                 | 0.92 (0.85,1.01)                 | 0.93 (0.85,1.02)                 | 0.86 (0.80,0.93)                 | 0.86 (0.80,0.94)                 | 1.02 (0.94,1.11)                 | 1.03 (0.95,1.12)                 |
|               |            |      |                                 | <i>P</i>                     | <i>P</i> = 2.72x10 <sup>-1</sup> | <i>P</i> = 5.66x10 <sup>-1</sup> | <i>P</i> = 7.17x10 <sup>-2</sup> | <i>P</i> = 1.12x10 <sup>-1</sup> | <i>P</i> = 1.35x10 <sup>-4</sup> | <i>P</i> = 3.14x10 <sup>-4</sup> | <i>P</i> = 5.60x10 <sup>-1</sup> | <i>P</i> = 5.07x10 <sup>-1</sup> |
| PPARG         | rs1801282  | 3    | C/G                             | OR (95%CI)                   | 0.94 (0.80,1.11)                 | 1.05 (0.85,1.30)                 | 0.88 (0.73,1.05)                 | 0.92 (0.75,1.11)                 | 0.87 (0.74,1.02)                 | 0.90 (0.76,1.06)                 | 1.04 (0.88,1.23)                 | 0.98 (0.91,1.06)                 |
|               |            |      |                                 | <i>P</i>                     | <i>P</i> = 4.97x10 <sup>-1</sup> | <i>P</i> = 6.44x10 <sup>-1</sup> | <i>P</i> = 1.72x10 <sup>-1</sup> | <i>P</i> = 3.66x10 <sup>-1</sup> | <i>P</i> = 9.23x10 <sup>-2</sup> | <i>P</i> = 2.16x10 <sup>-1</sup> | <i>P</i> = 6.46x10 <sup>-1</sup> | <i>P</i> = 7.18x10 <sup>-1</sup> |
| ADAMTS9       | rs4607103  | 3    | C/T                             | OR (95%CI)                   | 0.97 (0.89,1.05)                 | 1.00 (0.90,1.11)                 | 0.93 (0.85,1.02)                 | 0.93 (0.85,1.02)                 | 0.96 (0.88,1.04)                 | 0.97 (0.89,1.05)                 | 1.04 (0.95,1.14)                 | 1.09 (0.99,1.19)                 |
|               |            |      |                                 | <i>P</i>                     | <i>P</i> = 5.18x10 <sup>-1</sup> | <i>P</i> = 9.66x10 <sup>-1</sup> | <i>P</i> = 1.06x10 <sup>-1</sup> | <i>P</i> = 1.46x10 <sup>-1</sup> | <i>P</i> = 3.62x10 <sup>-1</sup> | <i>P</i> = 4.32x10 <sup>-1</sup> | <i>P</i> = 3.47x10 <sup>-1</sup> | <i>P</i> = 9.21x10 <sup>-2</sup> |
| WFS1          | rs10010131 | 4    | G/A                             | OR (95%CI)                   | 1.10 (0.90,1.33)                 | 1.20 (0.93,1.56)                 | 1.15 (0.92,1.43)                 | 1.15 (0.92,1.45)                 | 0.96 (0.79,1.16)                 | 0.95 (0.78,1.16)                 | 1.05 (0.85,1.30)                 | 1.02 (0.92,1.12)                 |
|               |            |      |                                 | <i>P</i>                     | <i>P</i> = 3.47x10 <sup>-1</sup> | <i>P</i> = 1.69x10 <sup>-1</sup> | <i>P</i> = 2.24x10 <sup>-1</sup> | <i>P</i> = 2.27x10 <sup>-1</sup> | <i>P</i> = 6.67x10 <sup>-1</sup> | <i>P</i> = 6.27x10 <sup>-1</sup> | <i>P</i> = 6.17x10 <sup>-1</sup> | <i>P</i> = 7.28x10 <sup>-1</sup> |
| ZBED3         | rs4457053  | 5    | A/G                             | OR (95%CI)                   | 1.07 (0.89,1.28)                 | 0.95 (0.75,1.20)                 | 1.10 (0.90,1.34)                 | 1.04 (0.84,1.29)                 | 1.03 (0.86,1.23)                 | 1.00 (0.84,1.20)                 | 1.03 (0.86,1.24)                 | 0.96 (0.87,1.05)                 |
|               |            |      |                                 | <i>P</i>                     | <i>P</i> = 4.59x10 <sup>-1</sup> | <i>P</i> = 6.73x10 <sup>-1</sup> | <i>P</i> = 3.71x10 <sup>-1</sup> | <i>P</i> = 6.97x10 <sup>-1</sup> | <i>P</i> = 7.24x10 <sup>-1</sup> | <i>P</i> = 9.75x10 <sup>-1</sup> | <i>P</i> = 7.33x10 <sup>-1</sup> | <i>P</i> = 3.49x10 <sup>-1</sup> |
| CDKAL1        | rs7756992  | 6    | G/A                             | OR (95%CI)                   | 0.98 (0.91,1.06)                 | 1.06 (0.96,1.18)                 | 1.01 (0.93,1.10)                 | 1.03 (0.94,1.14)                 | 0.98 (0.91,1.06)                 | 1.00 (0.93,1.09)                 | 0.98 (0.90,1.06)                 | 1.00 (0.90,1.11)                 |
|               |            |      |                                 | <i>P</i>                     | <i>P</i> = 6.61x10 <sup>-1</sup> | <i>P</i> = 2.55x10 <sup>-1</sup> | <i>P</i> = 7.80x10 <sup>-1</sup> | <i>P</i> = 4.71x10 <sup>-1</sup> | <i>P</i> = 5.95x10 <sup>-1</sup> | <i>P</i> = 9.74x10 <sup>-1</sup> | <i>P</i> = 5.70x10 <sup>-1</sup> | <i>P</i> = 9.51x10 <sup>-1</sup> |
| JAZF1         | rs864745   | 7    | A/G                             | OR (95%CI)                   | 1.00 (0.92,1.10)                 | 1.01 (0.89,1.14)                 | 0.96 (0.87,1.08)                 | 0.96 (0.86,1.08)                 | 1.05 (0.96,1.15)                 | 1.05 (0.96,1.16)                 | 1.04 (0.95,1.15)                 | 1.01 (0.92,1.10)                 |
|               |            |      |                                 | <i>P</i>                     | <i>P</i> = 9.60x10 <sup>-1</sup> | <i>P</i> = 8.91x10 <sup>-1</sup> | <i>P</i> = 5.05x10 <sup>-1</sup> | <i>P</i> = 4.84x10 <sup>-1</sup> | <i>P</i> = 2.63x10 <sup>-1</sup> | <i>P</i> = 2.59x10 <sup>-1</sup> | <i>P</i> = 3.61x10 <sup>-1</sup> | <i>P</i> = 8.96x10 <sup>-1</sup> |
| KLF14         | rs972283   | 7    | G/A                             | OR (95%CI)                   | 1.01 (0.93,1.10)                 | 1.05 (0.94,1.18)                 | 1.10 (1.00,1.22)                 | 1.12 (1.02,1.23)                 | 1.11 (1.02,1.24)                 | 1.12 (1.03,1.23)                 | 0.97 (0.89,1.06)                 | 1.06 (0.89,1.27)                 |
|               |            |      |                                 | <i>P</i>                     | <i>P</i> = 8.72x10 <sup>-1</sup> | <i>P</i> = 3.66x10 <sup>-1</sup> | <i>P</i> = 4.48x10 <sup>-2</sup> | <i>P</i> = 2.34x10 <sup>-2</sup> | <i>P</i> = 1.46x10 <sup>-2</sup> | <i>P</i> = 7.93x10 <sup>-3</sup> | <i>P</i> = 5.70x10 <sup>-1</sup> | <i>P</i> = 4.83x10 <sup>-1</sup> |
| TP53INP1      | rs896854   | 8    | G/A                             | OR (95%CI)                   | 1.06 (0.97,1.15)                 | 1.08 (0.97,1.20)                 | 1.03 (0.94,1.13)                 | 1.01 (0.92,1.12)                 | 1.02 (0.94,1.11)                 | 1.01 (0.93,1.10)                 | 0.99 (0.91,1.08)                 | 0.96 (0.88,1.04)                 |
|               |            |      |                                 | <i>P</i>                     | <i>P</i> = 1.75x10 <sup>-1</sup> | <i>P</i> = 1.67x10 <sup>-1</sup> | <i>P</i> = 5.68x10 <sup>-1</sup> | <i>P</i> = 7.75x10 <sup>-1</sup> | <i>P</i> = 6.78x10 <sup>-1</sup> | <i>P</i> = 8.03x10 <sup>-1</sup> | <i>P</i> = 8.73x10 <sup>-1</sup> | <i>P</i> = 3.13x10 <sup>-1</sup> |
| CDKN2BAS      | rs10811661 | 9    | T/C                             | OR (95%CI)                   | 0.93 (0.85,1.00)                 | 1.02 (0.92,1.13)                 | 0.99 (0.90,1.08)                 | 1.03 (0.94,1.14)                 | 1.02 (0.94,1.10)                 | 1.05 (0.97,1.15)                 | 0.96 (0.88,1.04)                 | 0.97 (0.86,1.10)                 |
|               |            |      |                                 | <i>P</i>                     | <i>P</i> = 6.48x10 <sup>-2</sup> | <i>P</i> = 8.86x10 <sup>-1</sup> | <i>P</i> = 7.98x10 <sup>-1</sup> | <i>P</i> = 4.72x10 <sup>-1</sup> | <i>P</i> = 6.03x10 <sup>-1</sup> | <i>P</i> = 1.96x10 <sup>-1</sup> | <i>P</i> = 3.10x10 <sup>-1</sup> | <i>P</i> = 6.74x10 <sup>-1</sup> |
| CHCHD9        | rs13292136 | 9    | C/T                             | OR (95%CI)                   | 0.88 (0.77,1.00)                 | 0.81 (0.68,0.96)                 | 1.04 (0.90,1.20)                 | 1.04 (0.89,1.20)                 | 0.95 (0.83,1.09)                 | 0.94 (0.83,1.08)                 | 1.03 (0.89,1.18)                 | 1.01 (0.92,1.10)                 |
|               |            |      |                                 | <i>P</i>                     | <i>P</i> = 5.23x10 <sup>-2</sup> | <i>P</i> = 1.62x10 <sup>-2</sup> | <i>P</i> = 5.62x10 <sup>-1</sup> | <i>P</i> = 6.07x10 <sup>-1</sup> | <i>P</i> = 4.64x10 <sup>-1</sup> | <i>P</i> = 3.94x10 <sup>-1</sup> | <i>P</i> = 7.06x10 <sup>-1</sup> | <i>P</i> = 8.64x10 <sup>-1</sup> |
| TCF7L2        | rs7903146  | 10   | C/T                             | OR (95%CI)                   | 1.04 (0.87,1.25)                 | 1.16 (0.92,1.46)                 | 0.74 (0.61,0.90)                 | 0.75 (0.61,0.92)                 | 0.82 (0.69,0.98)                 | 0.83 (0.69,0.99)                 | 0.92 (0.76,1.11)                 | 0.95 (0.78,1.17)                 |
|               |            |      |                                 | <i>P</i>                     | <i>P</i> = 6.62x10 <sup>-1</sup> | <i>P</i> = 2.20x10 <sup>-1</sup> | <i>P</i> = 2.55x10 <sup>-3</sup> | <i>P</i> = 5.03x10 <sup>-3</sup> | <i>P</i> = 3.18x10 <sup>-2</sup> | <i>P</i> = 4.36x10 <sup>-2</sup> | <i>P</i> = 3.64x10 <sup>-1</sup> | <i>P</i> = 6.52x10 <sup>-1</sup> |
| CDC123/CAMK1D | rs12779790 | 10   | A/G                             | OR (95%CI)                   | 0.95 (0.86,1.05)                 | 1.02 (0.89,1.16)                 | 0.96 (0.86,1.08)                 | 1.00 (0.89,1.13)                 | 0.99 (0.89,1.09)                 | 1.01 (0.91,1.12)                 | 0.99 (0.89,1.10)                 | 0.93 (0.75,1.15)                 |
|               |            |      |                                 | <i>P</i>                     | <i>P</i> = 3.43x10 <sup>-1</sup> | <i>P</i> = 7.81x10 <sup>-1</sup> | <i>P</i> = 4.78x10 <sup>-1</sup> | <i>P</i> = 8.82x10 <sup>-1</sup> | <i>P</i> = 7.82x10 <sup>-1</sup> | <i>P</i> = 8.59x10 <sup>-1</sup> | <i>P</i> = 8.29x10 <sup>-1</sup> | <i>P</i> = 4.79x10 <sup>-1</sup> |
| HHEX          | rs1111875  | 10   | A/G                             | OR (95%CI)                   | 1.05 (0.96,1.15)                 | 1.07 (0.96,1.19)                 | 0.96 (0.87,1.05)                 | 0.95 (0.86,1.05)                 | 1.02 (0.94,1.12)                 | 1.02 (0.94,1.12)                 | 1.00 (0.91,1.09)                 | 1.03 (0.94,1.13)                 |
|               |            |      |                                 | <i>P</i>                     | <i>P</i> = 2.60x10 <sup>-1</sup> | <i>P</i> = 2.48x10 <sup>-1</sup> | <i>P</i> = 3.71x10 <sup>-1</sup> | <i>P</i> = 3.39x10 <sup>-1</sup> | <i>P</i> = 5.87x10 <sup>-1</sup> | <i>P</i> = 6.03x10 <sup>-1</sup> | <i>P</i> = 9.34x10 <sup>-1</sup> | <i>P</i> = 4.93x10 <sup>-1</sup> |
| MTNR1B        | rs10830963 | 11   | C/G                             | OR (95%CI)                   | 0.92 (0.85,1.00)                 | 0.94 (0.85,1.04)                 | 1.06 (0.97,1.16)                 | 1.09 (1.00,1.20)                 | 0.96 (0.89,1.04)                 | 0.97 (0.90,1.06)                 | 0.96 (0.88,1.04)                 | 1.02 (0.85,1.23)                 |
|               |            |      |                                 | <i>P</i>                     | <i>P</i> = 4.07x10 <sup>-2</sup> | <i>P</i> = 1.99x10 <sup>-1</sup> | <i>P</i> = 1.65x10 <sup>-1</sup> | <i>P</i> = 6.13x10 <sup>-2</sup> | <i>P</i> = 3.56x10 <sup>-1</sup> | <i>P</i> = 5.12x10 <sup>-1</sup> | <i>P</i> = 2.84x10 <sup>-1</sup> | <i>P</i> = 8.22x10 <sup>-1</sup> |
| KCNQ1         | rs2237895  | 11   | A/C                             | OR (95%CI)                   | 0.89 (0.82,0.98)                 | 0.95 (0.85,1.07)                 | 0.95 (0.86,1.04)                 | 0.97 (0.88,1.08)                 | 1.00 (0.92,1.10)                 | 1.03 (0.94,1.12)                 | 0.91 (0.83,1.00)                 | 1.02 (0.94,1.12)                 |
|               |            |      |                                 | <i>P</i>                     | <i>P</i> = 1.29x10 <sup>-2</sup> | <i>P</i> = 3.77x10 <sup>-1</sup> | <i>P</i> = 2.61x10 <sup>-1</sup> | <i>P</i> = 5.76x10 <sup>-1</sup> | <i>P</i> = 9.53x10 <sup>-1</sup> | <i>P</i> = 5.84x10 <sup>-1</sup> | <i>P</i> = 5.32x10 <sup>-2</sup> | <i>P</i> = 6.09x10 <sup>-1</sup> |
| CEVT2D        | rs1552224  | 11   | T/G                             | OR (95%CI)                   | 0.96 (0.83,1.10)                 | 0.99 (0.83,1.19)                 | 1.02 (0.87,1.19)                 | 1.04 (0.88,1.22)                 | 1.08 (0.93,1.23)                 | 1.10 (0.95,1.27)                 | 1.06 (0.93,1.23)                 | 1.01 (0.93,1.11)                 |
|               |            |      |                                 | <i>P</i>                     | <i>P</i> = 5.55x10 <sup>-1</sup> | <i>P</i> = 9.26x10 <sup>-1</sup> | <i>P</i> = 8.19x10 <sup>-1</sup> | <i>P</i> = 6.24x10 <sup>-1</sup> | <i>P</i> = 2.87x10 <sup>-1</sup> | <i>P</i> = 2.03x10 <sup>-1</sup> | <i>P</i> = 3.78x10 <sup>-1</sup> | <i>P</i> = 7.65x10 <sup>-1</sup> |

(Continued)

Table 2. (Continued)

| Gene        | SNP        | Chr. | Major/minor allele <sup>a</sup> | Elevated waist circumference      |                           | Elevated blood pressure   |                                               | Elevated triglycerides    |                           | Reduced HDL-C             |                           |
|-------------|------------|------|---------------------------------|-----------------------------------|---------------------------|---------------------------|-----------------------------------------------|---------------------------|---------------------------|---------------------------|---------------------------|
|             |            |      |                                 | (men: ≥ 90 cm;<br>women: ≥ 85 cm) | (≥ 130/85 mm Hg)          | (≥ 1.7 mmol/l)            | (men: < 1.03 mmol/l;<br>women: < 1.29 mmol/l) |                           |                           |                           |                           |
|             |            |      |                                 | Model 1                           | Model 2                   | Model 1                   | Model 2                                       | Model 1                   | Model 2                   | Model 1                   | Model 2                   |
| TSPAN8/LGR5 | rs7961581  | 12   | T/C                             | OR (95%CI)                        | 0.96 (0.84,1.08)          | 0.93 (0.83,1.03)          | 0.91 (0.82,1.02)                              | 1.04 (0.95,1.15)          | 1.05 (0.95,1.15)          | 0.98 (0.89,1.08)          | 0.98 (0.85,1.12)          |
|             |            |      |                                 | P                                 | $P = 9.63 \times 10^{-1}$ | $P = 4.67 \times 10^{-1}$ | $P = 1.12 \times 10^{-1}$                     | $P = 3.84 \times 10^{-1}$ | $P = 3.73 \times 10^{-1}$ | $P = 7.22 \times 10^{-1}$ | $P = 7.23 \times 10^{-1}$ |
| ZFAND6      | rs11634397 | 15   | A/G                             | OR (95%CI)                        | 1.01 (0.88,1.14)          | 0.97 (0.82,1.15)          | 0.95 (0.82,1.09)                              | 1.14 (1.00,1.29)          | 1.14 (1.00,1.30)          | 0.90 (0.79,1.03)          | 0.93 (0.81,1.08)          |
|             |            |      |                                 | P                                 | $P = 9.38 \times 10^{-1}$ | $P = 7.26 \times 10^{-1}$ | $P = 4.39 \times 10^{-1}$                     | $P = 4.66 \times 10^{-2}$ | $P = 4.89 \times 10^{-2}$ | $P = 1.16 \times 10^{-1}$ | $P = 3.50 \times 10^{-1}$ |
| PRC1        | rs8042680  | 15   | A/C                             | OR (95%CI)                        | 0.83 (0.62,1.11)          | 0.83 (0.56,1.22)          | 1.20 (0.88,1.64)                              | 1.30 (0.94,1.82)          | 1.11 (0.83,1.47)          | 1.22 (0.90,1.64)          | 1.12 (0.98,1.28)          |
|             |            |      |                                 | P                                 | $P = 2.23 \times 10^{-1}$ | $P = 3.31 \times 10^{-1}$ | $P = 2.26 \times 10^{-1}$                     | $P = 1.06 \times 10^{-1}$ | $P = 4.83 \times 10^{-1}$ | $P = 2.03 \times 10^{-1}$ | $P = 9.12 \times 10^{-2}$ |
| FTO         | rs8050136  | 16   | C/A                             | OR (95%CI)                        | 1.07 (0.95,1.20)          | 0.96 (0.83,1.12)          | 1.03 (0.90,1.17)                              | 0.97 (0.85,1.11)          | 0.95 (0.85,1.07)          | 1.05 (0.93,1.18)          | 0.81 (0.60,1.10)          |
|             |            |      |                                 | P                                 | $P = 2.68 \times 10^{-1}$ | $P = 6.21 \times 10^{-1}$ | $P = 6.98 \times 10^{-1}$                     | $P = 6.79 \times 10^{-1}$ | $P = 4.13 \times 10^{-1}$ | $P = 4.51 \times 10^{-1}$ | $P = 1.76 \times 10^{-1}$ |
| FTO         | rs9939609  | 16   | T/A                             | OR (95%CI)                        | 1.07 (0.95,1.20)          | 0.97 (0.83,1.12)          | 1.03 (0.90,1.17)                              | 0.97 (0.85,1.11)          | 0.96 (0.86,1.08)          | 1.04 (0.93,1.18)          | 1.02 (0.91,1.15)          |
|             |            |      |                                 | P                                 | $P = 2.70 \times 10^{-1}$ | $P = 6.48 \times 10^{-1}$ | $P = 6.99 \times 10^{-1}$                     | $P = 6.99 \times 10^{-1}$ | $P = 5.13 \times 10^{-1}$ | $P = 4.85 \times 10^{-1}$ | $P = 7.04 \times 10^{-1}$ |
| TCF2        | rs7501939  | 17   | C/T                             | OR (95%CI)                        | 0.95 (0.87,1.04)          | 0.98 (0.87,1.09)          | 1.07 (0.98,1.18)                              | 1.09 (0.99,1.21)          | 0.97 (0.89,1.06)          | 0.98 (0.91,1.08)          | 1.03 (0.95,1.12)          |
|             |            |      |                                 | P                                 | $P = 2.63 \times 10^{-1}$ | $P = 6.80 \times 10^{-1}$ | $P = 1.42 \times 10^{-1}$                     | $P = 6.09 \times 10^{-2}$ | $P = 4.83 \times 10^{-1}$ | $P = 5.51 \times 10^{-1}$ | $P = 8.33 \times 10^{-1}$ |

<sup>a</sup> Previously reported risk alleles for T2D are shown in bold and underlined.

doi:10.1371/journal.pone.0143607.t002

adjustment for BMI ( $P > 0.05$ ). Further, the GRS did not contribute to the other MetS components in T2D patients (S3 Table). The associations between GRS and MetS-related components were further tested in the entire sample of cases and controls (S4 Table).

### Contribution of SNPs to MetS T2D, non-MetS T2D, and T2D with each MetS-related component

As shown in Table 4, the reported T2D risk allele of rs7756992 in *CDKALI*, rs10811661 near *CDKN2BAS*, rs7903146 in *TCF7L2*, rs1111875 near *HHEX*, and rs2237895 in *KCNQ1* were predisposed to both MetS T2D and non-MetS T2D compared with non-MetS controls. The associations remained significant after Bonferroni correction ( $P < 2.00 \times 10^{-3}$ ), except for the association between rs1111875 and T2D, and the association between rs7903146 and MetS T2D. In addition, the T allele of rs7903146 increased the risk for non-MetS T2D by 1.47-fold ( $P = 9.88 \times 10^{-5}$ ), while only increased the risk for MetS T2D by 1.20-fold ( $P = 2.91 \times 10^{-2}$ ).

On the other hand, rs243021 near *BCL11A*, rs780094 in *GCKR*, rs4607103 near *ADAMTS9*, rs972283 near *KLF14*, rs12779790 near *CDC123/CAMK1D*, and rs10830963 in *MTNR1B* were found related to non-MetS T2D ( $P$  values ranged from  $3.61 \times 10^{-3}$  to  $4.93 \times 10^{-2}$ ), while rs10010131 in *WFS1*, rs7961581 in *TSPAN8/LGR5*, rs8050136 and rs9939609 in *FTO*, and rs7501939 in *TCF2* contributed to MetS T2D ( $P$  values ranged from  $1.42 \times 10^{-4}$  to  $4.30 \times 10^{-2}$ ). The association between *FTO* and MetS T2D remained significant after Bonferroni correction ( $P < 2.00 \times 10^{-3}$ ). When further adjusted for BMI, the associations between rs7903146, rs7961581, rs8050136, rs9939609 and MetS T2D were attenuated ( $P > 0.05$ ). In addition, the reported T2D risk allele of rs972283 was associated with a decreased risk for non-MetS T2D in

**Table 3. Association between T2D GRS and the risk for abdominal obesity in T2D patients.** Abbreviations: BMI, body mass index; CI, confidence interval; GRS, genotype risk score; OR, odds ratio; Q, quartile; T2D, type 2 diabetes; WC, waist circumference. OR and 95% CI are reported for T2D GRS quartiles with the risk for abdominal obesity using logistic regression under an additive assumption using the following models: model 1, age and sex were adjusted as co-variables; model 2, age, sex, and BMI were adjusted.  $P$  values are calculated for T2D GRS quartiles.  $P_{trend}$  values are calculated for T2D GRS. All non-Gaussian distributed quantitative traits were natural logarithmically transformed to normalize distributions. Associations with  $P$  values  $< 0.05$  are shown in bold and underlined.

| Quartile | Elevated WC                                    |                                                | WC, cm                                                     |
|----------|------------------------------------------------|------------------------------------------------|------------------------------------------------------------|
|          | (men: $\geq 90$ cm;<br>women: $\geq 85$ cm)    |                                                |                                                            |
|          | Model 1                                        | Model 2                                        |                                                            |
| Q1       | 1                                              | 1                                              | 89.00 (82.00, 96.00)                                       |
| Q2       | 0.89 (0.75, 1.06)<br>$P = 1.78 \times 10^{-1}$ | 0.99 (0.79, 1.24)<br>$P = 9.34 \times 10^{-1}$ | 88.00 (82.00, 95.00)                                       |
| Q3       | 0.84 (0.71, 1.00)<br>$P = 5.24 \times 10^{-2}$ | 0.97 (0.77, 1.21)<br>$P = 7.73 \times 10^{-1}$ | 88.00 (81.00, 94.00)                                       |
| Q4       | 0.76 (0.63, 0.90)<br>$P = 2.10 \times 10^{-3}$ | 0.86 (0.68, 1.08)<br>$P = 1.99 \times 10^{-1}$ | 87.00 (80.00, 94.00)                                       |
|          | $P_{trend} = 1.29 \times 10^{-2}$              | $P_{trend} = 4.39 \times 10^{-1}$              | $P^a = 2.20 \times 10^{-3}$<br>$P^b = 3.72 \times 10^{-1}$ |

<sup>a</sup>,  $P$  value calculated for T2D GRS using linear regression under an additive assumption adjusted for age and sex.

<sup>b</sup>,  $P$  value calculated for T2D GRS using linear regression under an additive assumption adjusted for age, sex and BMI.

doi:10.1371/journal.pone.0143607.t003



**Table 4. Associations between T2D-related SNPs with non-MetS T2D and MetS T2D compared to non-MetS controls in DMS.** Abbreviations: BMI, body mass index; Chr, chromosome; CI, confidence interval; DMS, Chinese National Diabetes and Metabolic Disorders Study; MetS, metabolic syndrome; OR, odds ratio; SNP, single nucleotide polymorphism; T2D, type 2 diabetes. OR and 95% CI are indicated for the reported T2D risk allele of each SNP using logistic regression under an additive assumption using the following models: model 1, age and sex were adjusted as co-variables; and model 2, age, sex, and BMI were adjusted. Associations with *P* values < 0.05 are shown in bold and underlined.

| Gene          | SNP        | Chr. | Major/minor allele <sup>a</sup> | Non-MetS T2D v.s. Non-MetS controls | MetS T2D v.s. Non-MetS controls        |                                        |                                        |                                        |
|---------------|------------|------|---------------------------------|-------------------------------------|----------------------------------------|----------------------------------------|----------------------------------------|----------------------------------------|
|               |            |      |                                 |                                     | (1,518:4,373)                          |                                        | (3,651:4,373)                          |                                        |
|               |            |      |                                 |                                     | Model 1                                | Model 2                                | Model 1                                | Model 2                                |
| NOTCH2        | rs10923931 | 1    | G/T                             | OR (95%CI)                          | 0.89 (0.71,1.11)                       | 0.89 (0.71,1.11)                       | 0.91(0.77,1.08)                        | 0.88 (0.71,1.08)                       |
|               |            |      |                                 | <i>P</i>                            | <i>P</i> = 3.06×10 <sup>-1</sup>       | <i>P</i> = 3.12×10 <sup>-1</sup>       | <i>P</i> = 2.79×10 <sup>-1</sup>       | <i>P</i> = 2.10×10 <sup>-1</sup>       |
| BCL11A        | rs243021   | 2    | T/C                             | OR (95%CI)                          | 1.10 (1.01,1.20)                       | 1.10 (1.00,1.20)                       | 1.02 (0.95,1.09)                       | 0.98 (0.90,1.08)                       |
|               |            |      |                                 | <i>P</i>                            | <i>P</i> = <b>3.49×10<sup>-2</sup></b> | <i>P</i> = <b>4.70×10<sup>-2</sup></b> | <i>P</i> = 6.23×10 <sup>-1</sup>       | <i>P</i> = 7.20×10 <sup>-1</sup>       |
| GCKR          | rs780094   | 2    | A/G                             | OR (95%CI)                          | 1.13 (1.04,1.23)                       | 1.13 (1.04,1.23)                       | 1.03 (0.97,1.10)                       | 1.01 (0.93,1.09)                       |
|               |            |      |                                 | <i>P</i>                            | <i>P</i> = <b>3.61×10<sup>-3</sup></b> | <i>P</i> = <b>4.96×10<sup>-3</sup></b> | <i>P</i> = 3.66×10 <sup>-1</sup>       | <i>P</i> = 8.89×10 <sup>-1</sup>       |
| PPARG         | rs1801282  | 3    | C/G                             | OR (95%CI)                          | 1.15 (0.96,1.37)                       | 1.16 (0.97,1.39)                       | 1.04 (0.91,1.19)                       | 1.10 (0.93,1.30)                       |
|               |            |      |                                 | <i>P</i>                            | <i>P</i> = 1.24×10 <sup>-1</sup>       | <i>P</i> = 1.09×10 <sup>-1</sup>       | <i>P</i> = 5.82×10 <sup>-1</sup>       | <i>P</i> = 2.51×10 <sup>-1</sup>       |
| ADAMTS9       | rs4607103  | 3    | C/T                             | OR (95%CI)                          | 1.09 (1.00,1.19)                       | 1.10 (1.00,1.19)                       | 1.02 (0.95,1.09)                       | 1.04 (0.95,1.12)                       |
|               |            |      |                                 | <i>P</i>                            | <i>P</i> = <b>4.93×10<sup>-2</sup></b> | <i>P</i> = <b>4.38×10<sup>-2</sup></b> | <i>P</i> = 6.60×10 <sup>-1</sup>       | <i>P</i> = 3.91×10 <sup>-1</sup>       |
| WFS1          | rs10010131 | 4    | G/A                             | OR (95%CI)                          | 1.14 (0.93,1.41)                       | 1.16 (0.94,1.45)                       | 1.25 (1.06,1.47)                       | 1.33 (1.10,1.64)                       |
|               |            |      |                                 | <i>P</i>                            | <i>P</i> = 2.21×10 <sup>-1</sup>       | <i>P</i> = 1.46×10 <sup>-1</sup>       | <i>P</i> = <b>5.96×10<sup>-3</sup></b> | <i>P</i> = <b>4.15×10<sup>-3</sup></b> |
| ZBED3         | rs4457053  | 5    | A/G                             | OR (95%CI)                          | 0.86 (0.71,1.06)                       | 0.87 (0.71,1.07)                       | 1.01 (0.87,1.17)                       | 1.00 (0.83,1.20)                       |
|               |            |      |                                 | <i>P</i>                            | <i>P</i> = 1.58×10 <sup>-1</sup>       | <i>P</i> = 1.83×10 <sup>-1</sup>       | <i>P</i> = 8.88×10 <sup>-1</sup>       | <i>P</i> = 9.72×10 <sup>-1</sup>       |
| CDKAL1        | rs7756992  | 6    | G/A                             | OR (95%CI)                          | 1.15 (1.06,1.25)                       | 1.15 (1.05,1.25)                       | 1.12 (1.05,1.20)                       | 1.18 (1.09,1.28)                       |
|               |            |      |                                 | <i>P</i>                            | <i>P</i> = <b>1.07×10<sup>-3</sup></b> | <i>P</i> = <b>1.14×10<sup>-3</sup></b> | <i>P</i> = <b>4.50×10<sup>-4</sup></b> | <i>P</i> = <b>6.84×10<sup>-5</sup></b> |
| JAZF1         | rs864745   | 7    | A/G                             | OR (95%CI)                          | 1.01 (0.92,1.12)                       | 1.02 (0.92,1.12)                       | 1.02 (0.94,1.10)                       | 1.05 (0.95,1.15)                       |
|               |            |      |                                 | <i>P</i>                            | <i>P</i> = 8.03×10 <sup>-1</sup>       | <i>P</i> = 7.22×10 <sup>-1</sup>       | <i>P</i> = 6.90×10 <sup>-1</sup>       | <i>P</i> = 3.10×10 <sup>-1</sup>       |
| KLF14         | rs972283   | 7    | G/A                             | OR (95%CI)                          | 0.90 (0.82,0.99)                       | 0.85 (0.81, 0.98)                      | 1.18 (0.96,1.11)                       | 1.06 (0.97,1.16)                       |
|               |            |      |                                 | <i>P</i>                            | <i>P</i> = <b>2.59×10<sup>-2</sup></b> | <i>P</i> = <b>2.05×10<sup>-2</sup></b> | <i>P</i> = 3.66×10 <sup>-1</sup>       | <i>P</i> = 2.13×10 <sup>-1</sup>       |
| TP53INP1      | rs896854   | 8    | G/A                             | OR (95%CI)                          | 1.02 (0.93,1.12)                       | 1.02 (0.93,1.12)                       | 1.05 (0.98,1.121)                      | 1.04 (0.95,1.13)                       |
|               |            |      |                                 | <i>P</i>                            | <i>P</i> = 6.63×10 <sup>-1</sup>       | <i>P</i> = 6.46×10 <sup>-1</sup>       | <i>P</i> = 2.05×10 <sup>-1</sup>       | <i>P</i> = 3.96×10 <sup>-1</sup>       |
| CDKN2BAS      | rs10811661 | 9    | T/C                             | OR (95%CI)                          | 1.20 (1.11,1.32)                       | 1.20 (1.11,1.32)                       | 1.16 (1.09,1.25)                       | 1.25 (1.15,1.35)                       |
|               |            |      |                                 | <i>P</i>                            | <i>P</i> = <b>1.09×10<sup>-5</sup></b> | <i>P</i> = <b>1.42×10<sup>-5</sup></b> | <i>P</i> = <b>5.62×10<sup>-6</sup></b> | <i>P</i> = <b>5.54×10<sup>-8</sup></b> |
| CHCHD9        | rs13292136 | 9    | C/T                             | OR (95%CI)                          | 1.02 (0.88,1.18)                       | 1.01 (0.88,1.18)                       | 0.97 (0.87,1.08)                       | 0.98 (0.85,1.12)                       |
|               |            |      |                                 | <i>P</i>                            | <i>P</i> = 7.77×10 <sup>-1</sup>       | <i>P</i> = 8.65×10 <sup>-1</sup>       | <i>P</i> = 5.59×10 <sup>-1</sup>       | <i>P</i> = 7.97×10 <sup>-1</sup>       |
| TCF7L2        | rs7903146  | 10   | C/T                             | OR (95%CI)                          | 1.47 (1.21,1.78)                       | 1.47 (1.22,1.79)                       | 1.20 (1.02,1.40)                       | 1.19 (0.98,1.45)                       |
|               |            |      |                                 | <i>P</i>                            | <i>P</i> = <b>9.88×10<sup>-5</sup></b> | <i>P</i> = <b>8.14×10<sup>-5</sup></b> | <i>P</i> = <b>2.91×10<sup>-2</sup></b> | <i>P</i> = 8.69×10 <sup>-2</sup>       |
| CDC123/CAMK1D | rs12779790 | 10   | A/G                             | OR (95%CI)                          | 1.15 (1.03,1.28)                       | 1.15 (1.03,1.28)                       | 1.03 (0.94,1.12)                       | 1.09 (0.98,1.22)                       |
|               |            |      |                                 | <i>P</i>                            | <i>P</i> = <b>1.35×10<sup>-2</sup></b> | <i>P</i> = <b>1.39×10<sup>-2</sup></b> | <i>P</i> = 5.22×10 <sup>-1</sup>       | <i>P</i> = 1.07×10 <sup>-1</sup>       |
| HHEX          | rs1111875  | 10   | A/G                             | OR (95%CI)                          | 1.13 (1.03,1.24)                       | 1.13 (1.03,1.24)                       | 1.11 (1.03,1.19)                       | 1.11 (1.02,1.22)                       |
|               |            |      |                                 | <i>P</i>                            | <i>P</i> = <b>1.21×10<sup>-2</sup></b> | <i>P</i> = <b>1.16×10<sup>-2</sup></b> | <i>P</i> = <b>5.48×10<sup>-3</sup></b> | <i>P</i> = <b>1.82×10<sup>-2</sup></b> |
| MTNR1B        | rs10830963 | 11   | C/G                             | OR (95%CI)                          | 1.11 (1.02,1.21)                       | 1.10 (1.01,1.20)                       | 1.05 (0.98,1.12)                       | 1.06 (0.97,1.14)                       |
|               |            |      |                                 | <i>P</i>                            | <i>P</i> = <b>2.07×10<sup>-2</sup></b> | <i>P</i> = <b>2.94×10<sup>-2</sup></b> | <i>P</i> = 1.72×10 <sup>-1</sup>       | <i>P</i> = 1.93×10 <sup>-1</sup>       |
| KCNQ1         | rs2237895  | 11   | A/C                             | OR (95%CI)                          | 1.26 (1.15,1.38)                       | 1.25 (1.14,1.37)                       | 1.16 (1.07,1.24)                       | 1.18 (1.08,1.29)                       |
|               |            |      |                                 | <i>P</i>                            | <i>P</i> = <b>1.59×10<sup>-6</sup></b> | <i>P</i> = <b>3.20×10<sup>-6</sup></b> | <i>P</i> = <b>1.04×10<sup>-4</sup></b> | <i>P</i> = <b>3.08×10<sup>-4</sup></b> |
| CENTD2        | rs1552224  | 11   | T/G                             | OR (95%CI)                          | 1.08 (0.92,1.25)                       | 1.06 (0.92,1.25)                       | 1.06 (0.95,1.20)                       | 1.06 (0.93,1.22)                       |
|               |            |      |                                 | <i>P</i>                            | <i>P</i> = 3.69×10 <sup>-1</sup>       | <i>P</i> = 3.87×10 <sup>-1</sup>       | <i>P</i> = 2.54×10 <sup>-1</sup>       | <i>P</i> = 3.78×10 <sup>-1</sup>       |
| TSPAN8/LGR5   | rs7961581  | 12   | T/C                             | OR (95%CI)                          | 1.05 (0.95,1.17)                       | 1.04 (0.94,1.16)                       | 1.09 (1.00,1.18)                       | 1.05 (0.96,1.16)                       |
|               |            |      |                                 | <i>P</i>                            | <i>P</i> = 3.69×10 <sup>-1</sup>       | <i>P</i> = 3.87×10 <sup>-1</sup>       | <i>P</i> = 2.54×10 <sup>-1</sup>       | <i>P</i> = 3.78×10 <sup>-1</sup>       |

(Continued)

Table 4. (Continued)

| Gene   | SNP        | Chr. | Major/minor allele <sup>a</sup> | P                 | Non-MetS T2D v.s. Non-MetS controls |                           | MetS T2D v.s. Non-MetS controls    |                                    |
|--------|------------|------|---------------------------------|-------------------|-------------------------------------|---------------------------|------------------------------------|------------------------------------|
|        |            |      |                                 |                   | (1,518:4,373)                       |                           | (3,651:4,373)                      |                                    |
|        |            |      |                                 |                   | Model 1                             | Model 2                   | Model 1                            | Model 2                            |
|        |            |      |                                 |                   | $P = 3.62 \times 10^{-1}$           | $P = 4.48 \times 10^{-1}$ | $P = \mathbf{4.30 \times 10^{-2}}$ | $P = 2.94 \times 10^{-1}$          |
| ZFAND6 | rs11634397 | 15   | <u>A/G</u>                      | <b>OR (95%CI)</b> | 1.09 (0.95,1.25)                    | 1.10 (0.96,1.26)          | 1.03 (0.92,1.14)                   | 1.00 (0.87,1.14)                   |
|        |            |      |                                 | P                 | $P = 2.15 \times 10^{-1}$           | $P = 1.88 \times 10^{-1}$ | $P = 6.42 \times 10^{-1}$          | $P = 9.66 \times 10^{-1}$          |
| PRC1   | rs8042680  | 15   | <u>A/C</u>                      | <b>OR (95%CI)</b> | 0.92 (0.68,1.23)                    | 0.91 (0.68,1.23)          | 1.11 (0.88,1.43)                   | 1.19 (0.88,1.61)                   |
|        |            |      |                                 | P                 | $P = 5.66 \times 10^{-1}$           | $P = 5.42 \times 10^{-1}$ | $P = 3.81 \times 10^{-1}$          | $P = 2.71 \times 10^{-1}$          |
| FTO    | rs8050136  | 16   | <u>C/A</u>                      | <b>OR (95%CI)</b> | 1.11 (0.98,1.26)                    | 1.10 (0.97,1.25)          | 1.20 (1.08,1.32)                   | 1.08 (0.95,1.22)                   |
|        |            |      |                                 | P                 | $P = 1.03 \times 10^{-1}$           | $P = 1.49 \times 10^{-1}$ | $P = \mathbf{3.95 \times 10^{-4}}$ | $P = 2.32 \times 10^{-1}$          |
| FTO    | rs9939609  | 16   | <u>T/A</u>                      | <b>OR (95%CI)</b> | 1.13 (0.99,1.28)                    | 1.12 (0.98,1.27)          | 1.21 (1.10,1.34)                   | 1.09 (0.96,1.23)                   |
|        |            |      |                                 | P                 | $P = 6.25 \times 10^{-2}$           | $P = 9.65 \times 10^{-2}$ | $P = \mathbf{1.42 \times 10^{-4}}$ | $P = 1.76 \times 10^{-1}$          |
| TCF2   | rs7501939  | 17   | <u>C/T</u>                      | <b>OR (95%CI)</b> | 1.08 (0.99,1.19)                    | 1.08 (0.99,1.19)          | 1.12 (1.04,1.20)                   | 1.13 (1.03,1.24)                   |
|        |            |      |                                 | P                 | $P = 9.69 \times 10^{-2}$           | $P = 9.60 \times 10^{-2}$ | $P = \mathbf{3.44 \times 10^{-3}}$ | $P = \mathbf{7.45 \times 10^{-3}}$ |

<sup>a</sup> Previously reported risk alleles for T2D are shown in bold and underlined.

doi:10.1371/journal.pone.0143607.t004

the present study, while the risk alleles of the other genomic loci displayed similar trend as previously reported. Comparative sensitivity analysis including only the non-MetS super controls without any MetS components as controls, yielded results confirming most of the above findings (S5 Table).

Further, we compared the allele frequencies between T2D patients combined with one of the MetS-related components (abdominal obesity, high blood pressure, high TG, and low HDL-C) and non-MetS super controls (Table 5). Moderate-to-significant associations were observed between the reported risk alleles for T2D of rs10010131 in *WFS1*, rs7756992 in *CDKAL1*, rs10811661 near *CDKN2BAS*, rs2237895 in *KCNQ1*, rs8050136 and rs9939609 in *FTO*, rs7501939 in *TCF2* and the increased risk for the concurrence of T2D and each MetS component ( $P$  values ranged from  $3.42 \times 10^{-6}$  to  $5.61 \times 10^{-2}$ ). In addition, our findings suggested that the T2D risk allele of rs1111875 near *HHEX* only contributed to an increased risk for T2D combined with abdominal obesity ( $P = 2.63 \times 10^{-2}$ ), and T2D with elevated TG level ( $P = 4.60 \times 10^{-2}$ ). The T2D risk allele of rs7903146 in *TCF7L2* specifically contributed to an increased risk for T2D combined with abdominal obesity ( $P = 3.77 \times 10^{-2}$ ) and the T2D risk allele of rs7961581 in *TSPAN8/LGR5* was related to an increased risk for T2D with elevated TG level ( $P = 4.61 \times 10^{-2}$ ). As expected, these signals showed a large overlap with the associated SNPs of MetS T2D. Further, after additional adjustment for BMI, the associations between rs7903146, rs1111875, rs8050136, rs9939609 and T2D with abdominal obesity, the associations between rs8050136, rs9939609, rs7501939 and T2D with elevated blood pressure or reduced HDL-C levels, and the associations between rs1111875, rs7961581, rs9939609, rs7501939 and T2D with elevated TG level were attenuated ( $P > 0.05$ ). Moreover, the associations between rs7756992, rs10811661, rs2237895 and T2D with each metabolic component remained significant after Bonferroni correction ( $P < 5.00 \times 10^{-4}$ ).

## Discussion

MetS is the major risk factor for diabetes mellitus and CVD [1,46,47]. It is prevalent in patients with T2D [1]. Epidemiological evidence suggests that the comorbidity of T2D and MetS

**Table 5. Associations between T2D-related SNPs with T2D combined with each MetS-related component compared with non-MetS super controls in DMS.** Abbreviations: BMI, body mass index; Chr, chromosome; CI, confidence interval; DMS, Chinese National Diabetes and Metabolic Disorders Study; HDL-C, high density lipoprotein-cholesterol; MetS, metabolic syndrome; OR, odds ratio; SNP, single nucleotide polymorphism; T2D, type 2 diabetes. OR and 95% CI are indicated for the reported T2D risk allele of each SNP using logistic regression under an additive assumption using the following models: model 1, age and sex were adjusted as co-variables; model 2, age, sex, and BMI were adjusted. Associations with *P* values < 0.05 are shown in bold and underlined.

| SNP           | Gene       | Chr. | Major/minor allele <sup>a</sup> | T2D with elevated waist circumference v.s. Non-MetS super controls |                                  | T2D with elevated blood pressure v.s. Non-MetS super controls |                                  | T2D with elevated triglycerides v.s. Non-MetS super controls |                                  | T2D with reduced HDL-C v.s. Non-MetS super controls |                                  |                                  |
|---------------|------------|------|---------------------------------|--------------------------------------------------------------------|----------------------------------|---------------------------------------------------------------|----------------------------------|--------------------------------------------------------------|----------------------------------|-----------------------------------------------------|----------------------------------|----------------------------------|
|               |            |      |                                 | Model 1                                                            | Model 2                          | Model 1                                                       | Model 2                          | Model 1                                                      | Model 2                          | Model 1                                             | Model 2                          |                                  |
| NOTCH2        | rs10923931 | 1    | G/T                             | OR (95%CI)                                                         | 0.94 (0.75,1.17)                 | 0.99 (0.70,1.40)                                              | 1.02 (0.82,1.26)                 | 1.06 (0.81,1.39)                                             | 0.92 (0.73,1.15)                 | 0.94 (0.70,1.26)                                    | 0.90 (0.71,1.14)                 | 0.86 (0.65,1.15)                 |
|               |            |      |                                 | <i>P</i>                                                           | <i>P</i> = 5.59x10 <sup>-1</sup> | <i>P</i> = 9.53x10 <sup>-1</sup>                              | <i>P</i> = 8.82x10 <sup>-1</sup> | <i>P</i> = 6.57x10 <sup>-1</sup>                             | <i>P</i> = 4.74x10 <sup>-1</sup> | <i>P</i> = 9.94x10 <sup>-1</sup>                    | <i>P</i> = 3.80x10 <sup>-1</sup> | <i>P</i> = 3.16x10 <sup>-1</sup> |
| BCL11A        | rs243021   | 2    | T/C                             | OR (95%CI)                                                         | 1.05 (0.96,1.15)                 | 0.98 (0.85,1.12)                                              | 1.09 (0.99,1.19)                 | 1.10 (0.98,1.22)                                             | 1.05 (0.96,1.16)                 | 1.03 (0.92,1.16)                                    | 1.06 (0.97,1.18)                 | 1.01 (0.90,1.14)                 |
|               |            |      |                                 | <i>P</i>                                                           | <i>P</i> = 2.81x10 <sup>-1</sup> | <i>P</i> = 7.75x10 <sup>-1</sup>                              | <i>P</i> = 6.44x10 <sup>-2</sup> | <i>P</i> = 1.12x10 <sup>-1</sup>                             | <i>P</i> = 2.71x10 <sup>-1</sup> | <i>P</i> = 6.04x10 <sup>-1</sup>                    | <i>P</i> = 2.00x10 <sup>-1</sup> | <i>P</i> = 8.63x10 <sup>-1</sup> |
| GCKR          | rs780094   | 2    | A/G                             | OR (95%CI)                                                         | 1.02 (0.93,1.11)                 | 1.03 (0.90,1.17)                                              | 1.00 (0.92,1.09)                 | 1.00 (0.90,1.11)                                             | 0.94 (0.86,1.03)                 | 0.95 (0.85,1.06)                                    | 1.03 (0.94,1.12)                 | 1.01 (0.91,1.13)                 |
|               |            |      |                                 | <i>P</i>                                                           | <i>P</i> = 7.31x10 <sup>-1</sup> | <i>P</i> = 6.83x10 <sup>-1</sup>                              | <i>P</i> = 9.80x10 <sup>-1</sup> | <i>P</i> = 9.78x10 <sup>-1</sup>                             | <i>P</i> = 1.67x10 <sup>-1</sup> | <i>P</i> = 3.16x10 <sup>-1</sup>                    | <i>P</i> = 5.30x10 <sup>-1</sup> | <i>P</i> = 8.19x10 <sup>-1</sup> |
| PPARG         | rs1801282  | 3    | C/G                             | OR (95%CI)                                                         | 1.05 (0.88,1.27)                 | 1.12 (0.85,1.47)                                              | 1.02 (0.86,1.20)                 | 1.09 (0.88,1.35)                                             | 1.01 (0.85,1.19)                 | 1.02 (0.82,1.27)                                    | 1.14 (0.94,1.35)                 | 1.16 (0.93,1.47)                 |
|               |            |      |                                 | <i>P</i>                                                           | <i>P</i> = 5.28x10 <sup>-1</sup> | <i>P</i> = 4.04x10 <sup>-1</sup>                              | <i>P</i> = 8.26x10 <sup>-1</sup> | <i>P</i> = 4.19x10 <sup>-1</sup>                             | <i>P</i> = 9.52x10 <sup>-1</sup> | <i>P</i> = 8.67x10 <sup>-1</sup>                    | <i>P</i> = 1.90x10 <sup>-1</sup> | <i>P</i> = 1.72x10 <sup>-1</sup> |
| ADAMTS9       | rs4607103  | 3    | C/T                             | OR (95%CI)                                                         | 1.01 (0.92,1.10)                 | 1.01 (0.88,1.16)                                              | 0.99 (0.90,1.08)                 | 1.01 (0.91,1.12)                                             | 0.98 (0.89,1.08)                 | 0.99 (0.88,1.11)                                    | 1.06 (0.96,1.16)                 | 1.08 (0.95,1.20)                 |
|               |            |      |                                 | <i>P</i>                                                           | <i>P</i> = 8.49x10 <sup>-1</sup> | <i>P</i> = 8.30x10 <sup>-1</sup>                              | <i>P</i> = 7.92x10 <sup>-1</sup> | <i>P</i> = 8.47x10 <sup>-1</sup>                             | <i>P</i> = 7.05x10 <sup>-1</sup> | <i>P</i> = 8.65x10 <sup>-1</sup>                    | <i>P</i> = 2.13x10 <sup>-1</sup> | <i>P</i> = 2.43x10 <sup>-1</sup> |
| WFS1          | rs10010131 | 4    | G/A                             | OR (95%CI)                                                         | 1.35 (1.09,1.67)                 | 1.49 (1.08,2.04)                                              | 1.37 (1.11,1.67)                 | 1.56 (1.20,2.00)                                             | 1.28 (1.04,1.59)                 | 1.32 (1.01,1.72)                                    | 1.35 (1.08,1.67)                 | 1.30 (1.00,1.69)                 |
|               |            |      |                                 | <i>P</i>                                                           | <i>P</i> = 5.50x10 <sup>-3</sup> | <i>P</i> = 1.63x10 <sup>-2</sup>                              | <i>P</i> = 3.00x10 <sup>-3</sup> | <i>P</i> = 8.65x10 <sup>-4</sup>                             | <i>P</i> = 1.79x10 <sup>-2</sup> | <i>P</i> = 4.06x10 <sup>-2</sup>                    | <i>P</i> = 9.35x10 <sup>-3</sup> | <i>P</i> = 5.28x10 <sup>-2</sup> |
| ZBED3         | rs4457053  | 5    | A/G                             | OR (95%CI)                                                         | 1.03 (0.84,1.25)                 | 1.19 (0.88,1.62)                                              | 0.99 (0.82,1.20)                 | 0.97 (0.76,1.24)                                             | 1.00 (0.82,1.23)                 | 0.96 (0.74,1.24)                                    | 1.02 (0.83,1.25)                 | 1.00 (0.78,1.29)                 |
|               |            |      |                                 | <i>P</i>                                                           | <i>P</i> = 8.06x10 <sup>-1</sup> | <i>P</i> = 2.63x10 <sup>-1</sup>                              | <i>P</i> = 9.21x10 <sup>-1</sup> | <i>P</i> = 7.97x10 <sup>-1</sup>                             | <i>P</i> = 9.68x10 <sup>-1</sup> | <i>P</i> = 7.45x10 <sup>-1</sup>                    | <i>P</i> = 8.36x10 <sup>-1</sup> | <i>P</i> = 9.96x10 <sup>-1</sup> |
| CDKAL1        | rs7756992  | 6    | G/A                             | OR (95%CI)                                                         | 1.18 (1.08,1.28)                 | 1.30 (1.14,1.49)                                              | 1.20 (1.11,1.32)                 | 1.27 (1.14,1.41)                                             | 1.16 (1.08,1.28)                 | 1.25 (1.11,1.39)                                    | 1.16 (1.06,1.28)                 | 1.25 (1.12,1.39)                 |
|               |            |      |                                 | <i>P</i>                                                           | <i>P</i> = 2.14x10 <sup>-4</sup> | <i>P</i> = 8.31x10 <sup>-5</sup>                              | <i>P</i> = 1.18x10 <sup>-5</sup> | <i>P</i> = 8.50x10 <sup>-6</sup>                             | <i>P</i> = 5.25x10 <sup>-4</sup> | <i>P</i> = 9.71x10 <sup>-5</sup>                    | <i>P</i> = 8.48x10 <sup>-4</sup> | <i>P</i> = 7.69x10 <sup>-5</sup> |
| JAZF1         | rs864745   | 7    | A/G                             | OR (95%CI)                                                         | 0.99 (0.89,1.09)                 | 0.97 (0.83,1.14)                                              | 0.98 (0.88,1.08)                 | 0.98 (0.87,1.11)                                             | 1.01 (0.91,1.12)                 | 1.04 (0.92,1.19)                                    | 1.00 (0.90,1.11)                 | 1.01 (0.88,1.15)                 |
|               |            |      |                                 | <i>P</i>                                                           | <i>P</i> = 7.92x10 <sup>-1</sup> | <i>P</i> = 7.25x10 <sup>-1</sup>                              | <i>P</i> = 6.74x10 <sup>-1</sup> | <i>P</i> = 7.56x10 <sup>-1</sup>                             | <i>P</i> = 8.73x10 <sup>-1</sup> | <i>P</i> = 5.25x10 <sup>-1</sup>                    | <i>P</i> = 9.75x10 <sup>-1</sup> | <i>P</i> = 8.87x10 <sup>-1</sup> |
| KLF14         | rs972283   | 7    | G/A                             | OR (95%CI)                                                         | 0.98 (0.89,1.08)                 | 1.02 (0.88,1.19)                                              | 1.02 (0.93,1.12)                 | 1.05 (0.93,1.18)                                             | 1.02 (0.93,1.12)                 | 1.03 (0.91,1.16)                                    | 0.95 (0.86,1.05)                 | 0.95 (0.85,1.08)                 |
|               |            |      |                                 | <i>P</i>                                                           | <i>P</i> = 6.71x10 <sup>-1</sup> | <i>P</i> = 7.53x10 <sup>-1</sup>                              | <i>P</i> = 6.00x10 <sup>-1</sup> | <i>P</i> = 4.17x10 <sup>-1</sup>                             | <i>P</i> = 6.41x10 <sup>-1</sup> | <i>P</i> = 6.75x10 <sup>-1</sup>                    | <i>P</i> = 3.12x10 <sup>-1</sup> | <i>P</i> = 4.45x10 <sup>-1</sup> |
| TP53INP1      | rs896854   | 8    | G/A                             | OR (95%CI)                                                         | 1.09 (0.99,1.19)                 | 1.08 (0.94,1.25)                                              | 1.05 (0.96,1.15)                 | 1.06 (0.95,1.19)                                             | 1.06 (0.96,1.16)                 | 1.06 (0.94,1.19)                                    | 1.04 (0.95,1.15)                 | 1.05 (0.94,1.18)                 |
|               |            |      |                                 | <i>P</i>                                                           | <i>P</i> = 7.92x10 <sup>-2</sup> | <i>P</i> = 2.67x10 <sup>-1</sup>                              | <i>P</i> = 2.68x10 <sup>-1</sup> | <i>P</i> = 2.78x10 <sup>-1</sup>                             | <i>P</i> = 2.44x10 <sup>-1</sup> | <i>P</i> = 3.39x10 <sup>-1</sup>                    | <i>P</i> = 3.94x10 <sup>-1</sup> | <i>P</i> = 3.92x10 <sup>-1</sup> |
| CDKN2BAS      | rs10811661 | 9    | T/C                             | OR (95%CI)                                                         | 1.18 (1.08,1.28)                 | 1.35 (1.18,1.54)                                              | 1.19 (1.09,1.30)                 | 1.25 (1.12,1.39)                                             | 1.22 (1.11,1.33)                 | 1.28 (1.14,1.43)                                    | 1.17 (1.08,1.30)                 | 1.23 (1.11,1.39)                 |
|               |            |      |                                 | <i>P</i>                                                           | <i>P</i> = 2.40x10 <sup>-4</sup> | <i>P</i> = 1.70x10 <sup>-5</sup>                              | <i>P</i> = 6.82x10 <sup>-5</sup> | <i>P</i> = 4.69x10 <sup>-5</sup>                             | <i>P</i> = 1.21x10 <sup>-5</sup> | <i>P</i> = 2.06x10 <sup>-5</sup>                    | <i>P</i> = 3.56x10 <sup>-4</sup> | <i>P</i> = 1.44x10 <sup>-4</sup> |
| CHCHD9        | rs13292136 | 9    | C/T                             | OR (95%CI)                                                         | 0.93 (0.81,1.09)                 | 0.85 (0.68,1.05)                                              | 1.03 (0.89,1.19)                 | 1.04 (0.87,1.23)                                             | 0.99 (0.85,1.15)                 | 1.03 (0.85,1.25)                                    | 0.98 (0.84,1.14)                 | 1.01 (0.84,1.22)                 |
|               |            |      |                                 | <i>P</i>                                                           | <i>P</i> = 3.88x10 <sup>-1</sup> | <i>P</i> = 1.40x10 <sup>-1</sup>                              | <i>P</i> = 7.15x10 <sup>-1</sup> | <i>P</i> = 6.76x10 <sup>-1</sup>                             | <i>P</i> = 9.17x10 <sup>-1</sup> | <i>P</i> = 7.55x10 <sup>-1</sup>                    | <i>P</i> = 7.93x10 <sup>-1</sup> | <i>P</i> = 8.97x10 <sup>-1</sup> |
| TCF7L2        | rs7903146  | 10   | C/T                             | OR (95%CI)                                                         | 1.25 (1.01,1.54)                 | 1.27 (0.93,1.73)                                              | 1.12 (0.91,1.38)                 | 1.04 (0.81,1.35)                                             | 1.11 (0.89,1.37)                 | 1.04 (0.80,1.37)                                    | 1.19 (0.96,1.49)                 | 1.20 (0.92,1.57)                 |
|               |            |      |                                 | <i>P</i>                                                           | <i>P</i> = 3.77x10 <sup>-2</sup> | <i>P</i> = 1.36x10 <sup>-1</sup>                              | <i>P</i> = 2.83x10 <sup>-1</sup> | <i>P</i> = 7.55x10 <sup>-1</sup>                             | <i>P</i> = 3.63x10 <sup>-1</sup> | <i>P</i> = 7.55x10 <sup>-1</sup>                    | <i>P</i> = 1.15x10 <sup>-1</sup> | <i>P</i> = 1.73x10 <sup>-1</sup> |
| CDC123/CAMK1D | rs12779790 | 10   | A/G                             | OR (95%CI)                                                         | 1.02 (0.91,1.15)                 | 1.14 (0.96,1.37)                                              | 1.02 (0.91,1.14)                 | 1.10 (0.96,1.27)                                             | 1.04 (0.93,1.17)                 | 1.14 (0.98,1.32)                                    | 1.04 (0.92,1.17)                 | 1.12 (0.97,1.29)                 |
|               |            |      |                                 | <i>P</i>                                                           | <i>P</i> = 7.03x10 <sup>-1</sup> | <i>P</i> = 1.39x10 <sup>-1</sup>                              | <i>P</i> = 7.46x10 <sup>-1</sup> | <i>P</i> = 1.68x10 <sup>-1</sup>                             | <i>P</i> = 5.12x10 <sup>-1</sup> | <i>P</i> = 9.38x10 <sup>-2</sup>                    | <i>P</i> = 5.34x10 <sup>-1</sup> | <i>P</i> = 1.39x10 <sup>-1</sup> |
| HHHEX         | rs1111875  | 10   | A/G                             | OR (95%CI)                                                         | 1.11 (1.01,1.23)                 | 1.10 (0.95,1.27)                                              | 1.07 (0.98,1.18)                 | 1.01 (0.90,1.13)                                             | 1.10 (1.00,1.22)                 | 1.06 (0.94,1.20)                                    | 1.08 (0.98,1.20)                 | 1.08 (0.95,1.21)                 |
|               |            |      |                                 | <i>P</i>                                                           | <i>P</i> = 2.63x10 <sup>-2</sup> | <i>P</i> = 1.93x10 <sup>-1</sup>                              | <i>P</i> = 1.49x10 <sup>-1</sup> | <i>P</i> = 8.61x10 <sup>-1</sup>                             | <i>P</i> = 4.60x10 <sup>-2</sup> | <i>P</i> = 3.16x10 <sup>-1</sup>                    | <i>P</i> = 1.20x10 <sup>-1</sup> | <i>P</i> = 2.34x10 <sup>-1</sup> |
| MTNR1B        | rs10830963 | 11   | C/G                             | OR (95%CI)                                                         | 1.00 (0.91,1.09)                 | 0.96 (0.84,1.10)                                              | 1.07 (0.98,1.16)                 | 1.08 (0.97,1.20)                                             | 1.02 (0.94,1.12)                 | 1.02 (0.91,1.14)                                    | 1.01 (0.92,1.10)                 | 0.98 (0.88,1.10)                 |
|               |            |      |                                 | <i>P</i>                                                           | <i>P</i> = 9.14x10 <sup>-1</sup> | <i>P</i> = 5.95x10 <sup>-1</sup>                              | <i>P</i> = 1.44x10 <sup>-1</sup> | <i>P</i> = 1.42x10 <sup>-1</sup>                             | <i>P</i> = 6.21x10 <sup>-1</sup> | <i>P</i> = 7.20x10 <sup>-1</sup>                    | <i>P</i> = 8.73x10 <sup>-1</sup> | <i>P</i> = 7.69x10 <sup>-1</sup> |
| KCNQ1         | rs2237895  | 11   | A/C                             | OR (95%CI)                                                         | 1.20 (1.09,1.32)                 | 1.22 (1.05,1.42)                                              | 1.23 (1.11,1.35)                 | 1.26 (1.12,1.42)                                             | 1.26 (1.15,1.40)                 | 1.34 (1.19,1.52)                                    | 1.19 (1.07,1.31)                 | 1.25 (1.11,1.42)                 |
|               |            |      |                                 | <i>P</i>                                                           | <i>P</i> = 2.50x10 <sup>-4</sup> | <i>P</i> = 9.52x10 <sup>-5</sup>                              | <i>P</i> = 2.96x10 <sup>-5</sup> | <i>P</i> = 1.39x10 <sup>-4</sup>                             | <i>P</i> = 3.42x10 <sup>-6</sup> | <i>P</i> = 3.32x10 <sup>-6</sup>                    | <i>P</i> = 1.12x10 <sup>-3</sup> | <i>P</i> = 4.01x10 <sup>-4</sup> |
| CEN1D2        | rs1552224  | 11   | T/G                             | OR (95%CI)                                                         | 1.00 (0.86,1.16)                 | 0.83 (0.66,1.05)                                              | 1.02 (0.88,1.18)                 | 1.01 (0.84,1.22)                                             | 1.05 (0.91,1.23)                 | 1.03 (0.85,1.25)                                    | 1.03 (0.88,1.22)                 | 0.95 (0.79,1.15)                 |

(Continued)

Table 5. (Continued)

| SNP         | Gene       | Chr. | Major/minor allele <sup>a</sup> | T2D with elevated waist circumference v.s. Non-MetS super controls |                                  | T2D with elevated blood pressure v.s. Non-MetS super controls |                                  | T2D with elevated triglycerides v.s. Non-MetS super controls |                                  | T2D with reduced HDL-C v.s. Non-MetS super controls |                                  |
|-------------|------------|------|---------------------------------|--------------------------------------------------------------------|----------------------------------|---------------------------------------------------------------|----------------------------------|--------------------------------------------------------------|----------------------------------|-----------------------------------------------------|----------------------------------|
|             |            |      |                                 | Model 1                                                            | Model 2                          | Model 1                                                       | Model 2                          | Model 1                                                      | Model 2                          | Model 1                                             | Model 2                          |
| TSPAN8/LGR5 | rs7961581  | 12   | T/C                             | <i>P</i> = 9.94x10 <sup>-1</sup>                                   | <i>P</i> = 1.23x10 <sup>-1</sup> | <i>P</i> = 8.21x10 <sup>-1</sup>                              | <i>P</i> = 9.11x10 <sup>-1</sup> | <i>P</i> = 4.82x10 <sup>-1</sup>                             | <i>P</i> = 7.88x10 <sup>-1</sup> | <i>P</i> = 6.66x10 <sup>-1</sup>                    | <i>P</i> = 6.23x10 <sup>-1</sup> |
|             |            |      |                                 | <b>OR (95%CI)</b>                                                  | 1.08 (0.97, 1.20)                | 0.95 (0.81, 1.13)                                             | 1.06 (0.95, 1.18)                | 1.01 (0.89, 1.15)                                            | 1.12 (1.00, 1.24)                | 1.08 (0.94, 1.24)                                   | 1.08 (0.96, 1.21)                |
| ZFAND6      | rs11634397 | 15   | A/G                             | <i>P</i> = 1.66x10 <sup>-1</sup>                                   | <i>P</i> = 5.77x10 <sup>-1</sup> | <i>P</i> = 2.91x10 <sup>-1</sup>                              | <i>P</i> = 8.84x10 <sup>-1</sup> | <i>P</i> = <b>4.61x10<sup>-2</sup></b>                       | <i>P</i> = 2.90x10 <sup>-1</sup> | <i>P</i> = 1.97x10 <sup>-1</sup>                    | <i>P</i> = 4.30x10 <sup>-1</sup> |
|             |            |      |                                 | <b>OR (95%CI)</b>                                                  | 1.02 (0.89, 1.17)                | 0.96 (0.77, 1.19)                                             | 1.00 (0.87, 1.14)                | 1.03 (0.87, 1.22)                                            | 1.09 (0.94, 1.25)                | 1.07 (0.89, 1.27)                                   | 0.96 (0.83, 1.12)                |
| PRC1        | rs8042680  | 15   | A/C                             | <i>P</i> = 7.81x10 <sup>-1</sup>                                   | <i>P</i> = 6.98x10 <sup>-1</sup> | <i>P</i> = 9.43x10 <sup>-1</sup>                              | <i>P</i> = 7.26x10 <sup>-1</sup> | <i>P</i> = 2.54x10 <sup>-1</sup>                             | <i>P</i> = 4.88x10 <sup>-1</sup> | <i>P</i> = 6.04x10 <sup>-1</sup>                    | <i>P</i> = 3.04x10 <sup>-1</sup> |
|             |            |      |                                 | <b>OR (95%CI)</b>                                                  | 0.88 (0.64, 1.20)                | 0.92 (0.56, 1.52)                                             | 1.03 (0.75, 1.41)                | 1.22 (0.81, 1.82)                                            | 0.97 (0.70, 1.33)                | 1.03 (0.67, 1.59)                                   | 1.19 (0.83, 1.69)                |
| FTO         | rs8050136  | 16   | C/A                             | <i>P</i> = 4.20x10 <sup>-1</sup>                                   | <i>P</i> = 7.43x10 <sup>-1</sup> | <i>P</i> = 8.73x10 <sup>-1</sup>                              | <i>P</i> = 3.43x10 <sup>-1</sup> | <i>P</i> = 8.45x10 <sup>-1</sup>                             | <i>P</i> = 8.80x10 <sup>-1</sup> | <i>P</i> = 3.40x10 <sup>-1</sup>                    | <i>P</i> = 4.90x10 <sup>-1</sup> |
|             |            |      |                                 | <b>OR (95%CI)</b>                                                  | 1.21 (1.06, 1.37)                | 1.00 (0.82, 1.22)                                             | 1.18 (1.04, 1.35)                | 1.05 (0.89, 1.23)                                            | 1.14 (1.00, 1.30)                | 1.05 (0.89, 1.25)                                   | 1.21 (1.06, 1.39)                |
| FTO         | rs9939609  | 16   | T/A                             | <i>P</i> = <b>5.16x10<sup>-3</sup></b>                             | <i>P</i> = 9.87x10 <sup>-1</sup> | <i>P</i> = <b>1.09x10<sup>-2</sup></b>                        | <i>P</i> = 5.74x10 <sup>-1</sup> | <i>P</i> = 5.61x10 <sup>-2</sup>                             | <i>P</i> = 5.60x10 <sup>-1</sup> | <i>P</i> = <b>5.73x10<sup>-3</sup></b>              | <i>P</i> = 2.93x10 <sup>-1</sup> |
|             |            |      |                                 | <b>OR (95%CI)</b>                                                  | 1.23 (1.08, 1.40)                | 1.01 (0.83, 1.24)                                             | 1.20 (1.05, 1.36)                | 1.07 (0.91, 1.25)                                            | 1.17 (1.02, 1.34)                | 1.08 (0.91, 1.28)                                   | 1.23 (1.07, 1.41)                |
| TCF2        | rs7501939  | 17   | C/T                             | <i>P</i> = <b>1.92x10<sup>-3</sup></b>                             | <i>P</i> = 8.90x10 <sup>-1</sup> | <i>P</i> = <b>6.06x10<sup>-3</sup></b>                        | <i>P</i> = 4.38x10 <sup>-1</sup> | <i>P</i> = <b>2.19x10<sup>-2</sup></b>                       | <i>P</i> = 3.86x10 <sup>-1</sup> | <i>P</i> = <b>3.21x10<sup>-3</sup></b>              | <i>P</i> = 2.05x10 <sup>-1</sup> |
|             |            |      |                                 | <b>OR (95%CI)</b>                                                  | 1.10 (1.00, 1.21)                | 1.05 (0.91, 1.22)                                             | 1.13 (1.03, 1.24)                | 1.12 (1.00, 1.25)                                            | 1.11 (1.00, 1.22)                | 1.10 (0.97, 1.24)                                   | 1.11 (1.01, 1.23)                |
|             |            |      |                                 | <i>P</i> = 5.46x10 <sup>-2</sup>                                   | <i>P</i> = 4.92x10 <sup>-1</sup> | <i>P</i> = <b>1.06x10<sup>-2</sup></b>                        | <i>P</i> = 5.69x10 <sup>-2</sup> | <i>P</i> = <b>4.25x10<sup>-2</sup></b>                       | <i>P</i> = 1.42x10 <sup>-1</sup> | <i>P</i> = <b>3.85x10<sup>-2</sup></b>              | <i>P</i> = 7.31x10 <sup>-2</sup> |

<sup>a</sup> Previously reported risk alleles for T2D are shown in bold and underlined.

doi:10.1371/journal.pone.0143607.t005

increases the risk of CVD and all-cause mortality among T2D patients [2]. The current diagnostic criteria of MetS are based on the harmonized definition (2009) proposed by IDF and AHA/NHLBI, which requires presence of any three of the five components included in the IDF (2005) definition [28]. A previous study also suggested that the optimal cutoff of waist circumference for abdominal obesity in MetS should be 90 cm for men and 85 cm for women of Chinese [29]. In addition, as MetS is a constellation of clinical features, the association between genetic factor and MetS is strongly driven by the varied definitions of MetS. In the present study, we investigated the associations between 25 T2D-related genetic variants and MetS-related components in DMS, according to the recent harmonized criteria (2009) and the Chinese cutoffs for abdominal obesity, instead of MetS as a binary trait. The results revealed that seven genomic loci, including *BCL11A*, *GCKR*, *KLF14*, *TCF7L2*, *MTNR1B*, *KCNQ1*, and *ZFAND6* were significantly associated with MetS-related components in T2D among Chinese. It also indicated that T2D GRS of the 25 SNPs was related to a lower risk for abdominal obesity and decreased WC. Further, we identified the clusters of SNPs predisposed to non-MetS T2D and MetS T2D compared with the non-MetS controls, as well as the SNPs contributed to the risk for T2D with each MetS-related component. To the best of our knowledge, it is the first study focused on the associations of these candidate genes and MetS-related components among a large and national representative T2D population of Chinese Han.

The reported T2D risk alleles of three SNPs, including the T allele of rs243021 near *BCL11A*, the G allele of the intronic rs10830963 in *MTNR1B*, and the C allele of the intronic rs2237895 in *KCNQ1*, contributed to a decreased risk for abdominal obesity in T2D patients. All the genomic loci were found to be associated with T2D and  $\beta$ -cell dysfunction in human [43,48,49]. *BCL11A* functions as a leukemia disease gene. Its relationship with obesity and adiposity indices is unknown. *MTNR1B* encodes the melatonin receptor, which mediates the action of melatonin. *KCNQ1* encodes the potassium voltage gated channel, KQT like subfamily, member 1. Both *MTNR1B* and *KCNQ1* are expressed in pancreatic islets and play an essential role in the regulation of glucose homeostasis [50,51]. The G allele of rs10830963 was reported to be related to lower BMI [52]. The carriers of G allele were also found to be more sensitive to lifestyle intervention-induced reduction of WC in the Look AHEAD study [53]. Our previous study as well as the other studies have indicated that the C allele of rs2237895 was related to decreased BMI and WC in Chinese [54,55,56]. The results of the present study suggest a potential role of T2D-related genomic loci in abdominal obesity. However, the biological mechanism needs further elucidation.

The reported T2D risk allele G of *KLF14* contributed to the elevated blood pressure and TG levels in T2D patients. *KLF14* belongs to the Kruppel-like family of transcription factors. A biological study has demonstrated that *KLF14* could participate in the metabolism as a transcriptional activator via regulating the gene networks involved in lipid metabolism [57]. GWAS study identified a group of highly correlated SNPs including rs972283 and rs4731702 ( $r^2 = 0.967$  in Caucasians reported by 1000 Genome project) upstream of *KLF14* gene in association with multiple metabolic traits and T2D in Caucasians [45], which was recently confirmed by a meta-analysis in a global population [58]. Carriers of T2D risk allele of rs4731702 manifested higher fasting insulin, which suggested a role of its residue gene region in insulin resistance. In addition, rs4731702 was reported to be associated with gene expression in subcutaneous adipose tissue biopsies, which suggested that *KLF14* was the master trans-regulator of adipose gene expression [59]. The minor allele T of rs4731702 was previously reported to be associated with increased HDL-C and cholesterol in Chinese Hans [60]. Our present study revealed the contribution of G allele of rs972283 to increased risk of high blood pressure and elevated TG levels. In addition, in contrast to previous reports, the present results indicated that the G allele of rs972283 was protective against non-MetS T2D. However, these findings suggested the

significance of *KLF14* gene in metabolic modulation and require confirmation studies in the future.

The present study also revealed that the reported T2D risk allele T of rs7903146 in *TCF7L2* was related to decreased risk for elevated blood pressure and TG levels among T2D patients, which were unaltered by adjustment for BMI. The *TCF7L2* gene product is one of the T cell factor/lymphoid enhancer-binding factor transcription factors in Wnt /  $\beta$ -catenin signaling pathway. Studies have revealed the residue block of rs7903146 in *TCF7L2* as the strongest susceptible gene region for T2D in Caucasians [34], which is also applicable across different populations [12]. However, due to a relatively lower MAF of rs7903146 in Chinese Hans (0.029 reported by HapMap project) compared with Caucasians (0.308 reported by 1000 Genome project), larger sample sizes are required to achieve enough statistical power in Chinese. Our present study found a protective association of the T2D risk allele T of rs7903146 with blood pressure and TG levels independent of obesity, while contributing to the increased risk for T2D with or without MetS. It is well known that elevated blood pressure and TG levels are risk factors for T2D, and the above findings appear to be contradictory. However, the association between rs7903146 and hyperglycemia was stronger than its relationship with blood pressure or TG levels, suggesting a greater influence on the metabolic status of the general population [13,14,15,16,61,62,63] than in the diabetics. On the other hand, the pleiotropic effects of T allele on the factors promoting MetS or preventing MetS could partly explain the negative findings in previous studies [14,61,62,63]. In addition, a study reported that the T allele was the risk factor for incident hypertension [64] or increased TG level in elderly population [22], which was inconsistent with the present findings. However, the inconsistency could be partly explained by the different study design and population, as both the phenotypes were closely connection to blood glucose. The findings should be confirmed in the future studies.

The reported T2D risk allele G of rs780094 in *GCKR* showed a significant association with decreased risk for elevated TG level. *GCKR* encodes the glucokinase regulatory protein, which is a specific inhibitor of glucokinase in both liver and pancreatic islet cells by competitively forming a protein-protein complex with glucokinase with respect to glucose [65]. GWAS studies revealed that the G allele of rs780094 contributed to a higher risk for T2D, with pleiotropic effects on MetS-related traits including lower TG level in Caucasians and Chinese [66,67,68,69,70,71,72,73,74]. Accordingly, we previously confirmed the above findings in the newly diagnosed T2D from DMS [56]. In addition, the results showed that the T2D risk allele also contributed to the risk for non-MetS T2D in Chinese Hans from DMS, but not to the risk for MetS T2D.

The T2D risk allele G of rs11634397 near *ZFAND6* showed a moderate association with the increased risk for elevated TG level. The gene product of *ZFAND6*, the zinc finger AN1-type domain 6, has a functional interaction with tumor necrosis factor receptor-associated factor 2. It plays a role in the negative regulation of nuclear factor kappaB activation, and is a susceptible gene for T2D in Caucasian [45], but its biologic mechanism was still unclear. We previously observed that G allele of rs11634397 was related to lower insulinogenic index in Chinese [12]. The above finding suggested a potential role of *ZFAND6* in lipid metabolism. Additional studies are needed to confirm or refute the findings.

Interestingly, although obesity is a major risk factor of T2D, individuals with a higher T2D GRS had a lower risk for abdominal obesity and a decreased WC among Chinese T2D patients in the present study. The underlying mechanism is not clear. However, the association could be driven by the genetic loci of which the T2D risk allele was related to a decreased risk for abdominal obesity, including *BCL11A*, *MTNR1B*, and *KCNQ1*. In addition, GRS was not associated with the other MetS components in T2D, which might be partly due to the antagonistic

role of the T2D risk alleles. The results suggested that the T2D-related genomic loci have different biological roles in metabolic regulation.

Further, we observed that the associated SNPs clusters of MetS T2D or non-MetS T2D were substantially similar. For example, *TCF7L2*, *CDKN2BAS*, *CDKAL1*, *KCNQ1*, and *HHEX* contributed to both non-MetS T2D and MetS T2D. *MTNR1B*, *CDC123/CAMK1D*, *ADAMTS9*, *BCL11A*, *KLF14*, and *GCKR* were associated with non-MetS T2D, while *TSPAN8/LGR5*, *FTO*, *TCF2*, and *WFS1* were associated with MetS T2D. In our previous study, we confirmed the associations between SNPs in or near *WFS1*, *CDKAL1*, *CDKN2A/2B*, *CDC123/CAMK1D*, *HHEX*, *TCF7L2*, *KCNQ1*, *MTNR1B* and the risk for T2D in DMS [12]. These findings suggested that the associations of genomic loci and T2D could be modified by the individual metabolic status. For example, the associations between *TCF7L2*, *TSPAN8/LGR5*, *FTO* and MetS T2D were attenuated when adjusted for BMI, suggesting the role of obesity. The results also showed that SNPs related to MetS T2D were associated with T2D combined with at least one of the metabolic components. The underlying mechanism requires further elucidation.

The present study has several strengths. First, it investigated the associations between genomic loci and MetS-related components among T2D patients of Chinese Han origin, focusing on 25 genome-wide association loci of T2D, and based on a relatively large T2D population. Second, all the study subjects were Han Chinese from DMS who were genetically homogeneous. Third, the study used an optimal Chinese definition of abdominal obesity. However, our study has limitations. Until now, more than 120 genomic loci have been identified to be related to T2D [75]. In the present study, only 25 index SNPs from 24 genomic loci were examined. Thus, additional studies are warranted to reveal the associations between the other genomic loci and MetS components in Chinese. Only one SNP was selected from each genomic locus, which may result in negative findings due to the lack of adequate coverage of the candidate regions. In addition, the MetS group was conducted in T2D patients, which was not generalizable to the common population. However, better understanding of MetS pathogenesis in T2D is important for the prevention of CVD and other diabetes complications among diabetes patients. Further studies are warranted to replicate these findings.

In conclusion, the present study identified that genomic loci of *BCL11A*, *MTNR1B*, *KCNQ1*, *KLF14*, *TCF7L2*, *GCKR*, and *ZFAND6* were associated with MetS-related components among T2D in a large Chinese population. It's shown that T2D GRS was related to a lower risk for abdominal obesity. In addition, the results revealed the SNP clusters that contributed to MetS T2D, non-MetS T2D, and T2D with each MetS-related component, respectively. The present study may improve our understanding of the comorbidity of MetS and T2D. It also provides insights into the pleiotropic effects of T2D-related genomic loci.

## Supporting Information

**S1 Table. Information of SNPs genotyped in the present study.** Abbreviations: CHB, Han Chinese; Chr, chromosome; EU, European; HW- $P_{Control}$ , Hardy-Weinberg equilibrium in controls; HW- $P_{T2D}$ , Hardy-Weinberg equilibrium in T2D patients; MAF, minor allele frequency; SNP, single nucleotide polymorphism; T2D, type 2 diabetes. <sup>a</sup> Previously reported risk alleles for T2D are shown in bold and underlined. <sup>b</sup> The allele frequencies of the minor allele in the present study. <sup>c</sup> Allele frequencies of the minor allele in CHB and CEU populations of 1000 Genome Project. <sup>d</sup> The nearest gene is provided if a SNP is located in the intergenic region. (DOCX)

**S2 Table. Associations between T2D-related SNPs with MetS-related components in the entire sample of cases and controls.** Abbreviations: BMI, body mass index; Chr, chromosome; CI, confidence interval; HDL-C, high density lipoprotein-cholesterol; MetS, metabolic

syndrome; OR, odds ratio; SNP, single nucleotide polymorphism; T2D, type 2 diabetes. <sup>a</sup> Previously reported risk alleles for T2D are shown in bold and underlined. OR and 95% CI are indicated for the reported T2D risk allele of each SNP with MetS or MetS-related components using logistic regression under an additive assumption using the following models: model 1, age, sex and T2D status were adjusted as co-variables; and model 2, age, sex, T2D status and BMI were adjusted. Associations with  $P$  value  $< 0.05$  are shown in bold and underlined. (DOCX)

**S3 Table. Non-significant associations between T2D GRS and the risk for MetS-related components in T2D patients.** Abbreviations: BMI, body mass index; CI, confidence interval; DBP, diastolic blood pressure; HDL-C, high density lipoprotein-cholesterol; GRS, genotype risk score; MetS, metabolic syndrome; OR, odds ratio; Q, quartile; SBP, systolic blood pressure; T2D, type 2 diabetes; TG, triglycerides. OR and 95% CI are reported for T2D GRS quartiles with the risk for MetS components using logistic regression under an additive assumption using the following models: model 1, age and sex were adjusted as co-variables; and model 2, age, sex, and BMI were adjusted.  $P$  values are calculated for T2D GRS quartiles.  $P_{trend}$  values are calculated for T2D GRS. All non-Gaussian distributed quantitative traits were natural logarithmically transformed to normalize distributions. <sup>a</sup>,  $P$  value calculated for T2D GRS using linear regression under an additive assumption adjusted for age and sex. <sup>b</sup>,  $P$  value calculated for T2D GRS using linear regression under an additive assumption adjusted for age, sex and BMI. Associations with  $P$  values  $< 0.05$  are shown in bold and underlined. (DOCX)

**S4 Table. Associations between T2D GRS and the risk for MetS-related components in the entire sample of cases and controls.** Abbreviations: BMI, body mass index; CI, confidence interval; DBP, diastolic blood pressure; HDL-C, high density lipoprotein-cholesterol; GRS, genotype risk score; MetS, metabolic syndrome; OR, odds ratio; Q, quartile; SBP, systolic blood pressure; T2D, type 2 diabetes; TG, triglycerides; WC, waist circumference. OR and 95% CI are reported for T2D GRS quartiles with the risk for MetS components using logistic regression under an additive assumption using the following models: model 1, age, sex, and T2D status were adjusted as co-variables; and model 2, age, sex, T2D status and BMI were adjusted.  $P$  values are calculated for T2D GRS quartiles.  $P_{trend}$  values are calculated for T2D GRS. All non-Gaussian distributed quantitative traits were natural logarithmically transformed to normalize distributions. <sup>a</sup>,  $P$  value calculated for T2D GRS using linear regression under an additive assumption adjusted for age, sex, and T2D status. <sup>b</sup>,  $P$  value calculated for T2D GRS using linear regression under an additive assumption adjusted for age, sex, T2D status and BMI. Associations with  $P$  values  $< 0.05$  are shown in bold and underlined. (DOCX)

**S5 Table. Associations between SNPs with MetS T2D and non-MetS T2D compared with non-MetS super controls in DMS.** Abbreviations: BMI, body mass index; Chr, chromosome; CI, confidence interval; DMS, Chinese National Diabetes and Metabolic Disorders Study; MetS, metabolic syndrome; OR, odds ratio; SNP, single nucleotide polymorphism; T2D, type 2 diabetes. <sup>a</sup> Previously reported risk alleles for T2D are shown in bold and underlined. OR and 95% CI are indicated for the reported T2D risk allele of each SNP using logistic regression under an additive assumption using the following models: model 1, age and sex were adjusted as co-variables; and model 2, age, sex, and BMI were adjusted. Associations with  $P$  values  $< 0.05$  are shown in bold and underlined. (DOCX)



## Acknowledgments

We thank all the patients participating in the study. We thank all the staff of the DMS who contributed to recruitment of the participants and isolation of samples. We acknowledge the genotyping work of Beijing Genomics Institute, Shenzhen, China.

## Author Contributions

Conceived and designed the experiments: WY XK. Performed the experiments: XK XZ XX BZ JH. Analyzed the data: XK XZ XX BZ JH WY. Contributed reagents/materials/analysis tools: XK XZ XX BZ JH WY. Wrote the paper: XK XZ XX BZ JH WY.

## References

1. Rodriguez A, Delgado-Cohen H, Reviriego J, Serrano-Rios M (2011) Risk factors associated with metabolic syndrome in type 2 diabetes mellitus patients according to World Health Organization, Third Report National Cholesterol Education Program, and International Diabetes Federation definitions. *Diabetes Metab Syndr Obes* 4: 1–4.
2. Tan MC, Wong TW, Ng OC, Joseph A, Hejar AR (2014) Metabolic syndrome components and prevalence of cardiovascular disease among type 2 diabetic patients in Malaysia. *Southeast Asian J Trop Med Public Health* 45: 226–235. PMID: [24964674](#)
3. Bellia A, Giardina E, Lauro D, Tesaro M, Di Fede G, Cusumano G, et al. (2009) "The Linosa Study": epidemiological and heritability data of the metabolic syndrome in a Caucasian genetic isolate. *Nutr Metab Cardiovasc Dis* 19: 455–461. doi: [10.1016/j.numecd.2008.11.002](#) PMID: [19201175](#)
4. Henneman P, Aulchenko YS, Frants RR, van Dijk KW, Oostra BA, van Duijn CM (2008) Prevalence and heritability of the metabolic syndrome and its individual components in a Dutch isolate: the Erasmus Rucphen Family study. *J Med Genet* 45: 572–577. doi: [10.1136/jmg.2008.058388](#) PMID: [18550697](#)
5. Jeong SW, Chung M, Park SJ, Cho SB, Hong KW (2014) Genome-wide association study of metabolic syndrome in Koreans. *Genomics Inform* 12: 187–194. doi: [10.5808/GI.2014.12.4.187](#) PMID: [25705157](#)
6. Ali O (2013) Genetics of type 2 diabetes. *World J Diabetes* 4: 114–123. doi: [10.4239/wjd.v4.i4.114](#) PMID: [23961321](#)
7. Sun X, Yu W, Hu C (2014) Genetics of type 2 diabetes: insights into the pathogenesis and its clinical application. *Biomed Res Int* 2014: 926713. doi: [10.1155/2014/926713](#) PMID: [24864266](#)
8. Brunetti A, Chiefari E, Foti D (2014) Recent advances in the molecular genetics of type 2 diabetes mellitus. *World J Diabetes* 5: 128–140. doi: [10.4239/wjd.v5.i2.128](#) PMID: [24748926](#)
9. Stancakova A, Laakso M (2014) Genetics of metabolic syndrome. *Rev Endocr Metab Disord* 15: 243–252. doi: [10.1007/s11154-014-9293-9](#) PMID: [25124343](#)
10. Sookoian S, Pirola CJ (2011) Metabolic syndrome: from the genetics to the pathophysiology. *Curr Hypertens Rep* 13: 149–157. doi: [10.1007/s11906-010-0164-9](#) PMID: [20957457](#)
11. Monda KL, North KE, Hunt SC, Rao DC, Province MA, Kraja AT (2010) The genetics of obesity and the metabolic syndrome. *Endocr Metab Immune Disord Drug Targets* 10: 86–108. PMID: [20406164](#)
12. Zhao Q, Xiao J, He J, Zhang X, Hong J, Kong X, et al. (2014) Cross-sectional and longitudinal replication analyses of genome-wide association loci of type 2 diabetes in Han Chinese. *PLoS One* 9: e91790. doi: [10.1371/journal.pone.0091790](#) PMID: [24637646](#)
13. Wang YP, Wang WJ, Sheng TX, Cui ZW, Jin YH, Jin Y, et al. (2013) [Study of the association between SNP rs7903146(C/T) in TCF7L2 and metabolic syndrome in Chinese Korean and Han populations from Yanbian]. *Zhonghua Yi Xue Yi Chuan Xue Za Zhi* 30: 467–472. doi: [10.3760/cma.j.issn.1003-9406.2013.04.019](#) PMID: [23926018](#)
14. Sjogren M, Lyssenko V, Jonsson A, Berglund G, Nilsson P, Groop L, et al. (2008) The search for putative unifying genetic factors for components of the metabolic syndrome. *Diabetologia* 51: 2242–2251. doi: [10.1007/s00125-008-1151-4](#) PMID: [18853134](#)
15. Phillips CM, Goumidi L, Bertrais S, Field MR, McManus R, Hercberg S, et al. (2012) Dietary saturated fat, gender and genetic variation at the TCF7L2 locus predict the development of metabolic syndrome. *J Nutr Biochem* 23: 239–244. doi: [10.1016/j.jnutbio.2010.11.020](#) PMID: [21543200](#)
16. Povel CM, Boer JM, Reiling E, Feskens EJ (2011) Genetic variants and the metabolic syndrome: a systematic review. *Obes Rev* 12: 952–967. doi: [10.1111/j.1467-789X.2011.00907.x](#) PMID: [21749608](#)

17. Shi H, Yu X, Li Q, Ye X, Gao Y, Ma J, et al. (2012) Association between PPAR-gamma and RXR-alpha gene polymorphism and metabolic syndrome risk: a case-control study of a Chinese Han population. *Arch Med Res* 43: 233–242. doi: [10.1016/j.arcmed.2012.03.006](https://doi.org/10.1016/j.arcmed.2012.03.006) PMID: [22475777](https://pubmed.ncbi.nlm.nih.gov/22475777/)
18. Yang LL, Hua Q, Liu RK, Yang Z (2009) Association between two common polymorphisms of PPAR-gamma gene and metabolic syndrome families in a Chinese population. *Arch Med Res* 40: 89–96. doi: [10.1016/j.arcmed.2008.11.005](https://doi.org/10.1016/j.arcmed.2008.11.005) PMID: [19237017](https://pubmed.ncbi.nlm.nih.gov/19237017/)
19. Al-Attar SA, Pollex RL, Ban MR, Young TK, Bjerregaard P, Anand SS, et al. (2008) Association between the FTO rs9939609 polymorphism and the metabolic syndrome in a non-Caucasian multi-ethnic sample. *Cardiovasc Diabetol* 7: 5. doi: [10.1186/1475-2840-7-5](https://doi.org/10.1186/1475-2840-7-5) PMID: [18339204](https://pubmed.ncbi.nlm.nih.gov/18339204/)
20. Wang T, Huang Y, Xiao XH, Wang DM, Diao CM, Zhang F, et al. (2010) The association between common genetic variation in the FTO gene and metabolic syndrome in Han Chinese. *Chin Med J (Engl)* 123: 1852–1858.
21. Hotta K, Kitamoto T, Kitamoto A, Mizusawa S, Matsuo T, Nakata Y, et al. (2011) Association of variations in the FTO, SCG3 and MTMR9 genes with metabolic syndrome in a Japanese population. *J Hum Genet* 56: 647–651. doi: [10.1038/jhg.2011.74](https://doi.org/10.1038/jhg.2011.74) PMID: [21796137](https://pubmed.ncbi.nlm.nih.gov/21796137/)
22. Yang J, Liu J, Liu J, Li W, Li X, He Y, et al. (2014) Genetic association study with metabolic syndrome and metabolic-related traits in a cross-sectional sample and a 10-year longitudinal sample of Chinese elderly population. *PLoS One* 9: e100548. doi: [10.1371/journal.pone.0100548](https://doi.org/10.1371/journal.pone.0100548) PMID: [24959828](https://pubmed.ncbi.nlm.nih.gov/24959828/)
23. Strawbridge RJ, Dupuis J, Prokopenko I, Barker A, Ahlqvist E, Rybin D, et al. (2011) Genome-wide association identifies nine common variants associated with fasting proinsulin levels and provides new insights into the pathophysiology of type 2 diabetes. *Diabetes* 60: 2624–2634. doi: [10.2337/db11-0415](https://doi.org/10.2337/db11-0415) PMID: [21873549](https://pubmed.ncbi.nlm.nih.gov/21873549/)
24. Karns R, Zhang G, Jeran N, Havas-Augustin D, Missoni S, Niu W, et al. (2011) Replication of genetic variants from genome-wide association studies with metabolic traits in an island population of the Adriatic coast of Croatia. *Eur J Hum Genet* 19: 341–346. doi: [10.1038/ejhg.2010.178](https://doi.org/10.1038/ejhg.2010.178) PMID: [21150882](https://pubmed.ncbi.nlm.nih.gov/21150882/)
25. Schleinitz D, Tonjes A, Bottcher Y, Dietrich K, Enigk B, Koriath M, et al. (2010) Lack of significant effects of the type 2 diabetes susceptibility loci JAZF1, CDC123/CAMK1D, NOTCH2, ADAMTS9, THADA, and TSPAN8/LGR5 on diabetes and quantitative metabolic traits. *Horm Metab Res* 42: 14–22. doi: [10.1055/s-0029-1233480](https://doi.org/10.1055/s-0029-1233480) PMID: [19670153](https://pubmed.ncbi.nlm.nih.gov/19670153/)
26. Sanghera DK, Been L, Ortega L, Wander GS, Mehra NK, Aston CE, et al. (2009) Testing the association of novel meta-analysis-derived diabetes risk genes with type II diabetes and related metabolic traits in Asian Indian Sikhs. *J Hum Genet* 54: 162–168. doi: [10.1038/jhg.2009.7](https://doi.org/10.1038/jhg.2009.7) PMID: [19247373](https://pubmed.ncbi.nlm.nih.gov/19247373/)
27. Yang W, Lu J, Weng J, Jia W, Ji L, Xiao J, et al. (2010) Prevalence of diabetes among men and women in China. *N Engl J Med* 362: 1090–1101. doi: [10.1056/NEJMoa0908292](https://doi.org/10.1056/NEJMoa0908292) PMID: [20335585](https://pubmed.ncbi.nlm.nih.gov/20335585/)
28. Alberti KG, Eckel RH, Grundy SM, Zimmet PZ, Cleeman JI, Donato KA, et al. (2009) Harmonizing the metabolic syndrome: a joint interim statement of the International Diabetes Federation Task Force on Epidemiology and Prevention; National Heart, Lung, and Blood Institute; American Heart Association; World Heart Federation; International Atherosclerosis Society; and International Association for the Study of Obesity. *Circulation* 120: 1640–1645. doi: [10.1161/CIRCULATIONAHA.109.192644](https://doi.org/10.1161/CIRCULATIONAHA.109.192644) PMID: [19805654](https://pubmed.ncbi.nlm.nih.gov/19805654/)
29. Bao Y, Lu J, Wang C, Yang M, Li H, Zhang X, et al. (2008) Optimal waist circumference cutoffs for abdominal obesity in Chinese. *Atherosclerosis* 201: 378–384. doi: [10.1016/j.atherosclerosis.2008.03.001](https://doi.org/10.1016/j.atherosclerosis.2008.03.001) PMID: [18417137](https://pubmed.ncbi.nlm.nih.gov/18417137/)
30. Matthews DR, Hosker JP, Rudenski AS, Naylor BA, Treacher DF, Turner RC (1985) Homeostasis model assessment: insulin resistance and beta-cell function from fasting plasma glucose and insulin concentrations in man. *Diabetologia* 28: 412–419. PMID: [3899825](https://pubmed.ncbi.nlm.nih.gov/3899825/)
31. Phillips DI, Clark PM, Hales CN, Osmond C (1994) Understanding oral glucose tolerance: comparison of glucose or insulin measurements during the oral glucose tolerance test with specific measurements of insulin resistance and insulin secretion. *Diabet Med* 11: 286–292. PMID: [8033528](https://pubmed.ncbi.nlm.nih.gov/8033528/)
32. Matsuda M, DeFronzo RA (1999) Insulin sensitivity indices obtained from oral glucose tolerance testing: comparison with the euglycemic insulin clamp. *Diabetes Care* 22: 1462–1470. PMID: [10480510](https://pubmed.ncbi.nlm.nih.gov/10480510/)
33. Altshuler D, Hirschhorn JN, Klannemark M, Lindgren CM, Vohl MC, Nemesh J, et al. (2000) The common PPARgamma Pro12Ala polymorphism is associated with decreased risk of type 2 diabetes. *Nat Genet* 26: 76–80. PMID: [10973253](https://pubmed.ncbi.nlm.nih.gov/10973253/)
34. Grant SF, Thorleifsson G, Reynisdottir I, Benediktsson R, Manolescu A, Sainz J, et al. (2006) Variant of transcription factor 7-like 2 (TCF7L2) gene confers risk of type 2 diabetes. *Nat Genet* 38: 320–323. PMID: [16415884](https://pubmed.ncbi.nlm.nih.gov/16415884/)
35. Sandhu MS, Weedon MN, Fawcett KA, Wasson J, Debenham SL, Daly A, et al. (2007) Common variants in WFS1 confer risk of type 2 diabetes. *Nat Genet* 39: 951–953. PMID: [17603484](https://pubmed.ncbi.nlm.nih.gov/17603484/)

36. Gudmundsson J, Sulem P, Steinthorsdottir V, Bergthorsson JT, Thorleifsson G, Manolescu A, et al. (2007) Two variants on chromosome 17 confer prostate cancer risk, and the one in TCF2 protects against type 2 diabetes. *Nat Genet* 39: 977–983. PMID: [17603485](#)
37. Sladek R, Rocheleau G, Rung J, Dina C, Shen L, Serre D, et al. (2007) A genome-wide association study identifies novel risk loci for type 2 diabetes. *Nature* 445: 881–885. PMID: [17293876](#)
38. Zeggini E, Weedon MN, Lindgren CM, Frayling TM, Elliott KS, Lango H, et al. (2007) Replication of genome-wide association signals in UK samples reveals risk loci for type 2 diabetes. *Science* 316: 1336–1341. PMID: [17463249](#)
39. Scott LJ, Mohlke KL, Bonnycastle LL, Willer CJ, Li Y, Duren WL, et al. (2007) A genome-wide association study of type 2 diabetes in Finns detects multiple susceptibility variants. *Science* 316: 1341–1345. PMID: [17463248](#)
40. Steinthorsdottir V, Thorleifsson G, Reynisdottir I, Benediktsson R, Jonsdottir T, Walters GB, et al. (2007) A variant in CDKAL1 influences insulin response and risk of type 2 diabetes. *Nat Genet* 39: 770–775. PMID: [17460697](#)
41. Prokopenko I, Langenberg C, Florez JC, Saxena R, Soranzo N, Thorleifsson G, et al. (2009) Variants in MTNR1B influence fasting glucose levels. *Nat Genet* 41: 77–81. doi: [10.1038/ng.290](#) PMID: [19060907](#)
42. Saxena R, Voight BF, Lyssenko V, Burtt NP, de Bakker PI, Chen H, et al. (2007) Genome-wide association analysis identifies loci for type 2 diabetes and triglyceride levels. *Science* 316: 1331–1336. PMID: [17463246](#)
43. Zeggini E, Scott LJ, Saxena R, Voight BF, Marchini JL, Hu T, et al. (2008) Meta-analysis of genome-wide association data and large-scale replication identifies additional susceptibility loci for type 2 diabetes. *Nat Genet* 40: 638–645. doi: [10.1038/ng.120](#) PMID: [18372903](#)
44. Unoki H, Takahashi A, Kawaguchi T, Hara K, Horikoshi M, Andersen G, et al. (2008) SNPs in KCNQ1 are associated with susceptibility to type 2 diabetes in East Asian and European populations. *Nat Genet* 40: 1098–1102. doi: [10.1038/ng.208](#) PMID: [18711366](#)
45. Voight BF, Scott LJ, Steinthorsdottir V, Morris AP, Dina C, Welch RP, et al. (2010) Twelve type 2 diabetes susceptibility loci identified through large-scale association analysis. *Nat Genet* 42: 579–589. doi: [10.1038/ng.609](#) PMID: [20581827](#)
46. Pokharel DR, Khadka D, Sigdel M, Yadav NK, Acharya S, Kafle RC, et al. (2014) Prevalence of metabolic syndrome in Nepalese type 2 diabetic patients according to WHO, NCEP ATP III, IDF and Harmonized criteria. *J Diabetes Metab Disord* 13: 104. doi: [10.1186/s40200-014-0104-3](#) PMID: [25469328](#)
47. Hossain S, Fatema K, Ahmed KR, Akter J, Chowdhury HA, Shahjahan M, et al. (2014) Prevalence and determinants of metabolic syndrome among newly diagnosed type 2 diabetic subjects according to different criteria. *Diabetes Metab Syndr*.
48. Simonis-Bik AM, Nijpels G, van Haeften TW, Houwing-Duistermaat JJ, Boomsma DI, Reiling E, et al. (2010) Gene variants in the novel type 2 diabetes loci CDC123/CAMK1D, THADA, ADAMTS9, BCL11A, and MTNR1B affect different aspects of pancreatic beta-cell function. *Diabetes* 59: 293–301. doi: [10.2337/db09-1048](#) PMID: [19833888](#)
49. Jonsson A, Ladenvall C, Ahluwalia TS, Kravic J, Krus U, Taneera J, et al. (2013) Effects of common genetic variants associated with type 2 diabetes and glycemic traits on alpha- and beta-cell function and insulin action in humans. *Diabetes* 62: 2978–2983. doi: [10.2337/db12-1627](#) PMID: [23557703](#)
50. Yamagata K, Senokuchi T, Lu M, Takemoto M, Fazlul KM, Go C, et al. (2011) Voltage-gated K<sup>+</sup> channel KCNQ1 regulates insulin secretion in MIN6 beta-cell line. *Biochem Biophys Res Commun* 407: 620–625. doi: [10.1016/j.bbrc.2011.03.083](#) PMID: [21426901](#)
51. Mulder H, Nagorny CL, Lyssenko V, Groop L (2009) Melatonin receptors in pancreatic islets: good morning to a novel type 2 diabetes gene. *Diabetologia* 52: 1240–1249. doi: [10.1007/s00125-009-1359-y](#) PMID: [19377888](#)
52. Stancakova A, Kuulasmaa T, Paananen J, Jackson AU, Bonnycastle LL, Collins FS, et al. (2009) Association of 18 confirmed susceptibility loci for type 2 diabetes with indices of insulin release, proinsulin conversion, and insulin sensitivity in 5,327 nondiabetic Finnish men. *Diabetes* 58: 2129–2136. doi: [10.2337/db09-0117](#) PMID: [19502414](#)
53. Peter I, McCaffery JM, Kelley-Hedgpepeth A, Hakonarson H, Reis S, Wagenknecht LE, et al. (2012) Association of type 2 diabetes susceptibility loci with one-year weight loss in the look AHEAD clinical trial. *Obesity (Silver Spring)* 20: 1675–1682.
54. Liu Y, Zhou DZ, Zhang D, Chen Z, Zhao T, Zhang Z, et al. (2009) Variants in KCNQ1 are associated with susceptibility to type 2 diabetes in the population of mainland China. *Diabetologia* 52: 1315–1321. doi: [10.1007/s00125-009-1375-y](#) PMID: [19448982](#)

55. Yu W, Ma RC, Hu C, So WY, Zhang R, Wang C, et al. (2012) Association between KCNQ1 genetic variants and obesity in Chinese patients with type 2 diabetes. *Diabetologia* 55: 2655–2659. doi: [10.1007/s00125-012-2636-8](https://doi.org/10.1007/s00125-012-2636-8) PMID: [22790062](https://pubmed.ncbi.nlm.nih.gov/22790062/)
56. Kong X, Hong J, Chen Y, Chen L, Zhao Z, Li Q, et al. (2013) Association of genetic variants with isolated fasting hyperglycaemia and isolated postprandial hyperglycaemia in a Han Chinese population. *PLoS One* 8: e71399. doi: [10.1371/journal.pone.0071399](https://doi.org/10.1371/journal.pone.0071399) PMID: [23990951](https://pubmed.ncbi.nlm.nih.gov/23990951/)
57. de Assuncao TM, Lombark G, Cao S, Yaqoob U, Mathison A, Simonetto DA, et al. (2014) New role for Kruppel-like factor 14 as a transcriptional activator involved in the generation of signaling lipids. *J Biol Chem* 289: 15798–15809. doi: [10.1074/jbc.M113.544346](https://doi.org/10.1074/jbc.M113.544346) PMID: [24759103](https://pubmed.ncbi.nlm.nih.gov/24759103/)
58. Wang J, Zhang J, Shen J, Hu D, Yan G, Liu X, et al. (2014) Association of KCNQ1 and KLF14 polymorphisms and risk of type 2 diabetes mellitus: A global meta-analysis. *Hum Immunol* 75: 342–347. doi: [10.1016/j.humimm.2014.01.008](https://doi.org/10.1016/j.humimm.2014.01.008) PMID: [24486580](https://pubmed.ncbi.nlm.nih.gov/24486580/)
59. Small KS, Hedman AK, Grundberg E, Nica AC, Thorleifsson G, Kong A, et al. (2011) Identification of an imprinted master trans regulator at the KLF14 locus related to multiple metabolic phenotypes. *Nat Genet* 43: 561–564. doi: [10.1038/ng.833](https://doi.org/10.1038/ng.833) PMID: [21572415](https://pubmed.ncbi.nlm.nih.gov/21572415/)
60. Chen X, Li S, Yang Y, Yang X, Liu Y, Liu Y, et al. (2012) Genome-wide association study validation identifies novel loci for atherosclerotic cardiovascular disease. *J Thromb Haemost* 10: 1508–1514. doi: [10.1111/j.1538-7836.2012.04815.x](https://doi.org/10.1111/j.1538-7836.2012.04815.x) PMID: [22702842](https://pubmed.ncbi.nlm.nih.gov/22702842/)
61. Cruz M, Valladares-Salgado A, Garcia-Mena J, Ross K, Edwards M, Angeles-Martinez J, et al. (2010) Candidate gene association study conditioning on individual ancestry in patients with type 2 diabetes and metabolic syndrome from Mexico City. *Diabetes Metab Res Rev* 26: 261–270. doi: [10.1002/dmrr.1082](https://doi.org/10.1002/dmrr.1082) PMID: [20503258](https://pubmed.ncbi.nlm.nih.gov/20503258/)
62. Saadi H, Nagelkerke N, Carruthers SG, Benedict S, Abdulkhalek S, Reed R, et al. (2008) Association of TCF7L2 polymorphism with diabetes mellitus, metabolic syndrome, and markers of beta cell function and insulin resistance in a population-based sample of Emirati subjects. *Diabetes Res Clin Pract* 80: 392–398. doi: [10.1016/j.diabres.2008.01.008](https://doi.org/10.1016/j.diabres.2008.01.008) PMID: [18282631](https://pubmed.ncbi.nlm.nih.gov/18282631/)
63. Sarzani R, Salvi F, Bordicchia M, Pietrucci F, Caraceni D, Lancioni L, et al. (2008) TCF7L2 alleles and metabolic syndrome in non-diabetic obese hypertensive patients. *J Hum Hypertens* 22: 373–375. doi: [10.1038/jhh.2008.8](https://doi.org/10.1038/jhh.2008.8) PMID: [18288125](https://pubmed.ncbi.nlm.nih.gov/18288125/)
64. Bonnet F, Roussel R, Natali A, Cauchi S, Petrie J, Laville M, et al. (2013) Parental history of type 2 diabetes, TCF7L2 variant and lower insulin secretion are associated with incident hypertension. Data from the DESIR and RISC cohorts. *Diabetologia* 56: 2414–2423. doi: [10.1007/s00125-013-3021-y](https://doi.org/10.1007/s00125-013-3021-y) PMID: [23942764](https://pubmed.ncbi.nlm.nih.gov/23942764/)
65. Irwin DM, Tan H (2014) Evolution of glucose utilization: glucokinase and glucokinase regulator protein. *Mol Phylogenet Evol* 70: 195–203. doi: [10.1016/j.ympev.2013.09.016](https://doi.org/10.1016/j.ympev.2013.09.016) PMID: [24075984](https://pubmed.ncbi.nlm.nih.gov/24075984/)
66. Ling Y, Li X, Gu Q, Chen H, Lu D, Gao X (2011) Associations of common polymorphisms in GCKR with type 2 diabetes and related traits in a Han Chinese population: a case-control study. *BMC Med Genet* 12: 66. doi: [10.1186/1471-2350-12-66](https://doi.org/10.1186/1471-2350-12-66) PMID: [21569451](https://pubmed.ncbi.nlm.nih.gov/21569451/)
67. Liu Y, Zhou D, Zhang Z, Song Y, Zhang D, Zhao T, et al. (2011) Effects of genetic variants on lipid parameters and dyslipidemia in a Chinese population. *J Lipid Res* 52: 354–360. doi: [10.1194/jlr.P007476](https://doi.org/10.1194/jlr.P007476) PMID: [21149302](https://pubmed.ncbi.nlm.nih.gov/21149302/)
68. Aulchenko YS, Ripatti S, Lindqvist I, Boomsma D, Heid IM, Pramstaller PP, et al. (2009) Loci influencing lipid levels and coronary heart disease risk in 16 European population cohorts. *Nat Genet* 41: 47–55. doi: [10.1038/ng.269](https://doi.org/10.1038/ng.269) PMID: [19060911](https://pubmed.ncbi.nlm.nih.gov/19060911/)
69. Kathiresan S, Melander O, Guiducci C, Surti A, Burtt NP, Rieder MJ, et al. (2008) Six new loci associated with blood low-density lipoprotein cholesterol, high-density lipoprotein cholesterol or triglycerides in humans. *Nat Genet* 40: 189–197. doi: [10.1038/ng.75](https://doi.org/10.1038/ng.75) PMID: [18193044](https://pubmed.ncbi.nlm.nih.gov/18193044/)
70. Coram MA, Duan Q, Hoffmann TJ, Thornton T, Knowles JW, Johnson NA, et al. (2013) Genome-wide characterization of shared and distinct genetic components that influence blood lipid levels in ethnically diverse human populations. *Am J Hum Genet* 92: 904–916. doi: [10.1016/j.ajhg.2013.04.025](https://doi.org/10.1016/j.ajhg.2013.04.025) PMID: [23726366](https://pubmed.ncbi.nlm.nih.gov/23726366/)
71. Wallace C, Newhouse SJ, Braund P, Zhang F, Tobin M, Falchi M, et al. (2008) Genome-wide association study identifies genes for biomarkers of cardiovascular disease: serum urate and dyslipidemia. *Am J Hum Genet* 82: 139–149. doi: [10.1016/j.ajhg.2007.11.001](https://doi.org/10.1016/j.ajhg.2007.11.001) PMID: [18179892](https://pubmed.ncbi.nlm.nih.gov/18179892/)
72. Willer CJ, Sanna S, Jackson AU, Scuteri A, Bonnycastle LL, Clarke R, et al. (2008) Newly identified loci that influence lipid concentrations and risk of coronary artery disease. *Nat Genet* 40: 161–169. doi: [10.1038/ng.76](https://doi.org/10.1038/ng.76) PMID: [18193043](https://pubmed.ncbi.nlm.nih.gov/18193043/)
73. Dupuis J, Langenberg C, Prokopenko I, Saxena R, Soranzo N, Jackson AU, et al. (2010) New genetic loci implicated in fasting glucose homeostasis and their impact on type 2 diabetes risk. *Nat Genet* 42: 105–116. doi: [10.1038/ng.520](https://doi.org/10.1038/ng.520) PMID: [20081858](https://pubmed.ncbi.nlm.nih.gov/20081858/)

74. Manning AK, Hivert MF, Scott RA, Grimsby JL, Bouatia-Naji N, Chen H, et al. (2012) A genome-wide approach accounting for body mass index identifies genetic variants influencing fasting glycemic traits and insulin resistance. *Nat Genet* 44: 659–669. doi: [10.1038/ng.2274](https://doi.org/10.1038/ng.2274) PMID: [22581228](https://pubmed.ncbi.nlm.nih.gov/22581228/)
75. Prasad RB, Groop L (2015) Genetics of type 2 diabetes-pitfalls and possibilities. *Genes (Basel)* 6: 87–123.
